# Supplementary material for: Effect of Diosmin on Selected Parameters of Oxygen Homeostasis
Source: MDPI journal article supplement (doi:10.3390/ijms241612917), 2023-08-18
Supplement: s1 [file s1]

## Supplementary material

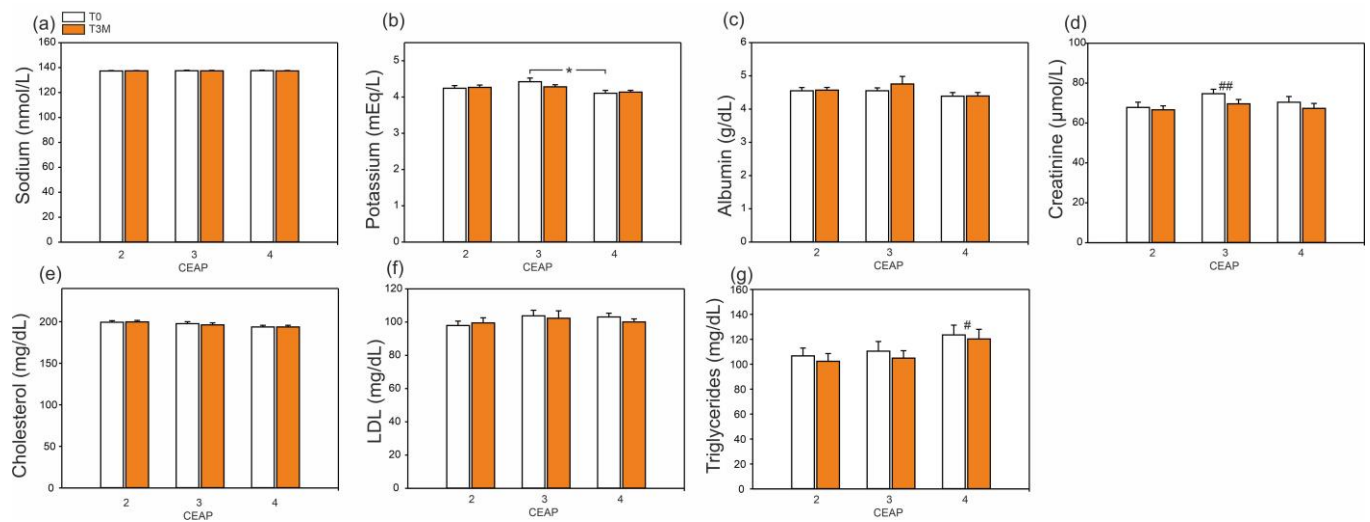

**Figure S1.** Basic blood parameters in patients before (T0) and after the three-month treatment with diosmin (T3M): (a)- sodium, (b)- potassium, (c)- albumin, (d)- creatinine, (e)- cholesterol, (f)- LDL and (g)- triglycerides. Data are the mean ± SE (n = 16 for CEAP 2 and 3; n = 15 for CEAP 4), significant difference between CEAP within the same time at p < 0.05 (\*), significant difference between T0 and T3M within the same CEAP at p < 0.05 (#), p < 0.01 (##).
