# Supplementary material for: Effect of Diosmin on Selected Parameters of Oxygen Homeostasis
Source: Int J Mol Sci. 2023 Aug 18;24(16):12917. doi: 10.3390/ijms241612917 (PMC10454919; doi:10.3390/ijms241612917)
Supplement: Supplementary file 1 [file ijms-24-12917-s001.zip › korelacje.xlsx]

## Sheet: Arkusz4
Zmienna	Korelacje (dane) Oznaczone wsp. korelacji są istotne z p < ,05000
	BMI T0	BMI T3M	index Tiffen	LVEF%	TNFa T0	TNFa T3M	VEGFA T0	VEGFA T3M	VEGFC T0	VEGF T3M	IL6 T0	IL6 T3M	FGF T0	FGF T3M	FGF23 T0	FGF23 T3M	IL1betaT0	IL1betaT3M	HIF T0	HIF1 T3M	IL 12 T0	IL12 T3M	pH ven T0	pH ven T3M	lactatesT0	lactatesT3M	Alb T0	Alb T3M	Na+ T0	Na+ T3M	K+ T0	K+ T3M	Phosph T0	Phosph T3M	AG T0	AG T3M	Hb T0	Hb T3M	RBC T0	RBC T3M	FerritineT0	FerritineT3M	SaO2 T0	SaO2 T3M	kreat T0 mmol/l	kreat mmol/l	Chol Cał T0	Chol Cał T3M	LDL T0
BMI T0	1,0000	,9134	,0238	-,1487	-,0307	-,1958	-,3001	-,1786	,0693	,2989	-,3036	-,0715	-,0396	,0346	-,0254	-,0842	-,1719	-,2182	-,0040	,1630	-,2346	,0179	-,0744	,0262	-,1049	-,1806	,3204	,3955	,0749	,0259	,0597	,2115	-,0558	-,0462	,1229	,3054	-,0128	-,0156	,2851	,1592	,0783	,0467	,0093	-,1402	,0486	-,0155	,1317	,1908	,0479
	N=47	N=47	N=47	N=47	N=47	N=47	N=47	N=47	N=47	N=47	N=47	N=47	N=47	N=47	N=47	N=47	N=47	N=47	N=47	N=47	N=47	N=47	N=47	N=47	N=47	N=47	N=47	N=47	N=47	N=47	N=47	N=47	N=47	N=47	N=47	N=47	N=47	N=47	N=47	N=47	N=47	N=47	N=47	N=47	N=47	N=47	N=47	N=47	N=47
	p= ---	p=0,00	p=,874	p=,319	p=,838	p=,187	p=,040	p=,230	p=,644	p=,041	p=,038	p=,633	p=,791	p=,817	p=,866	p=,574	p=,248	p=,141	p=,979	p=,274	p=,113	p=,905	p=,619	p=,861	p=,483	p=,224	p=,028	p=,006	p=,617	p=,863	p=,690	p=,154	p=,710	p=,758	p=,410	p=,037	p=,932	p=,917	p=,052	p=,285	p=,601	p=,755	p=,951	p=,347	p=,746	p=,918	p=,378	p=,199	p=,749
BMI T3M	,9134	1,0000	,0894	-,2265	,0394	-,1834	-,2792	-,1168	-,0060	,2375	-,2255	,0265	-,0800	-,0127	-,0156	-,0392	-,1330	-,1718	,0255	,1994	-,2015	-,0181	-,0406	-,0616	-,0204	-,0803	,2681	,3615	,1567	,1189	,0783	,1938	-,0742	-,0450	,1248	,2875	,0495	-,0250	,2629	,2125	,0041	-,0571	-,0386	-,0127	,1015	,0460	,0248	,1023	,0847
	N=47	N=47	N=47	N=47	N=47	N=47	N=47	N=47	N=47	N=47	N=47	N=47	N=47	N=47	N=47	N=47	N=47	N=47	N=47	N=47	N=47	N=47	N=47	N=47	N=47	N=47	N=47	N=47	N=47	N=47	N=47	N=47	N=47	N=47	N=47	N=47	N=47	N=47	N=47	N=47	N=47	N=47	N=47	N=47	N=47	N=47	N=47	N=47	N=47
	p=0,00	p= ---	p=,550	p=,126	p=,793	p=,217	p=,057	p=,434	p=,968	p=,108	p=,128	p=,860	p=,593	p=,933	p=,917	p=,794	p=,373	p=,248	p=,865	p=,179	p=,174	p=,904	p=,786	p=,681	p=,892	p=,592	p=,068	p=,013	p=,293	p=,426	p=,601	p=,192	p=,620	p=,764	p=,403	p=,050	p=,741	p=,868	p=,074	p=,152	p=,978	p=,703	p=,797	p=,932	p=,497	p=,759	p=,869	p=,494	p=,572
index Tiffen	,0238	,0894	1,0000	,1495	,2565	,1739	,1027	,2390	-,1138	,0268	-,1529	-,1568	-,2459	-,1551	,0210	,0284	,0688	,3165	-,0249	,0323	,3496	,2000	,3373	,2599	-,0066	-,1140	-,2473	-,1536	-,2006	-,2452	-,0348	-,1689	-,0652	-,1440	,2548	,1835	,2877	,1657	,0373	,0602	,2308	,1171	-,1666	,0845	,0296	-,0132	,2084	,1728	,1959
	N=47	N=47	N=47	N=47	N=47	N=47	N=47	N=47	N=47	N=47	N=47	N=47	N=47	N=47	N=47	N=47	N=47	N=47	N=47	N=47	N=47	N=47	N=47	N=47	N=47	N=47	N=47	N=47	N=47	N=47	N=47	N=47	N=47	N=47	N=47	N=47	N=47	N=47	N=47	N=47	N=47	N=47	N=47	N=47	N=47	N=47	N=47	N=47	N=47
	p=,874	p=,550	p= ---	p=,316	p=,082	p=,242	p=,492	p=,106	p=,446	p=,858	p=,305	p=,292	p=,096	p=,298	p=,888	p=,850	p=,646	p=,030	p=,868	p=,830	p=,016	p=,178	p=,020	p=,078	p=,965	p=,446	p=,094	p=,303	p=,176	p=,097	p=,816	p=,256	p=,663	p=,334	p=,084	p=,217	p=,050	p=,266	p=,803	p=,688	p=,119	p=,433	p=,263	p=,572	p=,843	p=,930	p=,160	p=,245	p=,187
LVEF%	-,1487	-,2265	,1495	1,0000	,0228	,1668	,1426	,1388	,2601	-,1656	,0460	,0151	-,0479	-,0741	-,1241	-,1562	,1763	,3602	,1369	-,1031	-,0070	,1646	,1445	,1667	-,3190	-,1560	-,3671	-,4077	,0944	-,0588	,1447	,1108	,2129	,1319	-,0601	-,1143	-,1112	-,1745	-,0834	-,0579	-,1187	,0499	,0854	-,2693	,0809	-,0017	,1233	,1307	-,2008
	N=47	N=47	N=47	N=47	N=47	N=47	N=47	N=47	N=47	N=47	N=47	N=47	N=47	N=47	N=47	N=47	N=47	N=47	N=47	N=47	N=47	N=47	N=47	N=47	N=47	N=47	N=47	N=47	N=47	N=47	N=47	N=47	N=47	N=47	N=47	N=47	N=47	N=47	N=47	N=47	N=47	N=47	N=47	N=47	N=47	N=47	N=47	N=47	N=47
	p=,319	p=,126	p=,316	p= ---	p=,879	p=,263	p=,339	p=,352	p=,077	p=,266	p=,759	p=,920	p=,749	p=,621	p=,406	p=,294	p=,236	p=,013	p=,359	p=,490	p=,963	p=,269	p=,332	p=,263	p=,029	p=,295	p=,011	p=,004	p=,528	p=,694	p=,332	p=,458	p=,151	p=,377	p=,688	p=,444	p=,457	p=,241	p=,577	p=,699	p=,427	p=,739	p=,568	p=,067	p=,589	p=,991	p=,409	p=,381	p=,176
TNFa T0	-,0307	,0394	,2565	,0228	1,0000	-,0660	,1762	-,0267	-,1241	,0994	-,1417	-,0522	,0486	,0356	,0892	,1269	,0615	,0640	,0967	,1189	-,0925	-,1542	-,0196	,0232	,0089	,0259	,0014	-,1406	-,1216	-,1299	-,2141	-,3090	,0320	,0297	,2923	-,1850	-,0163	-,1909	-,0576	-,0190	-,1534	-,0382	-,0738	,2628	,1357	,2654	-,1516	-,0693	-,1949
	N=47	N=47	N=47	N=47	N=47	N=47	N=47	N=47	N=47	N=47	N=47	N=47	N=47	N=47	N=47	N=47	N=47	N=47	N=47	N=47	N=47	N=47	N=47	N=47	N=47	N=47	N=47	N=47	N=47	N=47	N=47	N=47	N=47	N=47	N=47	N=47	N=47	N=47	N=47	N=47	N=47	N=47	N=47	N=47	N=47	N=47	N=47	N=47	N=47
	p=,838	p=,793	p=,082	p=,879	p= ---	p=,659	p=,236	p=,858	p=,406	p=,506	p=,342	p=,727	p=,746	p=,812	p=,551	p=,395	p=,681	p=,669	p=,518	p=,426	p=,537	p=,301	p=,896	p=,877	p=,952	p=,863	p=,992	p=,346	p=,416	p=,384	p=,148	p=,035	p=,831	p=,843	p=,046	p=,213	p=,914	p=,199	p=,701	p=,899	p=,303	p=,799	p=,622	p=,074	p=,363	p=,071	p=,309	p=,643	p=,189
TNFa T3M	-,1958	-,1834	,1739	,1668	-,0660	1,0000	,2250	,5965	,0212	-,3197	,4454	,3473	-,0032	,0761	-,0163	-,0973	-,1792	,1658	-,0633	-,0010	,2846	,0826	,3028	,1160	-,2340	-,1922	-,2460	-,1738	,0332	,0407	,3019	,0960	,2959	,3314	-,2206	-,1434	,1365	,0373	-,2921	-,3702	,0498	,0509	,0356	-,1029	-,1564	-,2822	-,1306	-,1974	,0743
	N=47	N=47	N=47	N=47	N=47	N=47	N=47	N=47	N=47	N=47	N=47	N=47	N=47	N=47	N=47	N=47	N=47	N=47	N=47	N=47	N=47	N=47	N=47	N=47	N=47	N=47	N=47	N=47	N=47	N=47	N=47	N=47	N=47	N=47	N=47	N=47	N=47	N=47	N=47	N=47	N=47	N=47	N=47	N=47	N=47	N=47	N=47	N=47	N=47
	p=,187	p=,217	p=,242	p=,263	p=,659	p= ---	p=,128	p=,000	p=,887	p=,028	p=,002	p=,017	p=,983	p=,611	p=,914	p=,515	p=,228	p=,265	p=,673	p=,994	p=,053	p=,581	p=,039	p=,437	p=,113	p=,196	p=,096	p=,243	p=,825	p=,786	p=,039	p=,521	p=,043	p=,023	p=,136	p=,336	p=,360	p=,803	p=,046	p=,010	p=,739	p=,734	p=,812	p=,491	p=,294	p=,055	p=,382	p=,184	p=,619
VEGFA T0	-,3001	-,2792	,1027	,1426	,1762	,2250	1,0000	,3407	,2354	-,0296	,2827	,2222	,1635	,1099	,3294	,3212	,2944	,3206	-,0315	,0227	-,0070	-,0561	,1437	-,0591	-,0135	,1669	-,0040	-,0829	,0185	-,0434	-,0989	-,0982	,1848	,2343	-,1219	-,0180	,0093	-,0961	-,3314	-,3208	-,2239	-,0237	,0621	-,0960	,0815	,0666	-,1245	-,0284	-,1240
	N=47	N=47	N=47	N=47	N=47	N=47	N=47	N=47	N=47	N=47	N=47	N=47	N=47	N=47	N=47	N=47	N=47	N=47	N=47	N=47	N=47	N=47	N=47	N=47	N=47	N=47	N=47	N=47	N=47	N=47	N=47	N=47	N=47	N=47	N=47	N=47	N=47	N=47	N=47	N=47	N=47	N=47	N=47	N=47	N=47	N=47	N=47	N=47	N=47
	p=,040	p=,057	p=,492	p=,339	p=,236	p=,128	p= ---	p=,019	p=,111	p=,843	p=,054	p=,133	p=,272	p=,462	p=,024	p=,028	p=,045	p=,028	p=,834	p=,880	p=,963	p=,708	p=,335	p=,693	p=,928	p=,262	p=,979	p=,579	p=,902	p=,772	p=,508	p=,511	p=,214	p=,113	p=,414	p=,905	p=,951	p=,521	p=,023	p=,028	p=,130	p=,874	p=,678	p=,521	p=,586	p=,656	p=,405	p=,850	p=,406
VEGFA T3M	-,1786	-,1168	,2390	,1388	-,0267	,5965	,3407	1,0000	,2707	-,2285	,4532	,3545	-,0112	,0697	,1992	,0777	,1723	,4460	-,0666	,0151	,4233	,2220	,3283	,1582	,1440	,0580	-,3683	-,2177	-,1578	-,1702	,1159	-,0617	,2234	,2535	-,2027	-,1553	,0777	,0762	-,4776	-,4568	,0486	,0997	-,1493	-,2985	-,3822	-,4368	-,1804	-,1803	,1150
	N=47	N=47	N=47	N=47	N=47	N=47	N=47	N=47	N=47	N=47	N=47	N=47	N=47	N=47	N=47	N=47	N=47	N=47	N=47	N=47	N=47	N=47	N=47	N=47	N=47	N=47	N=47	N=47	N=47	N=47	N=47	N=47	N=47	N=47	N=47	N=47	N=47	N=47	N=47	N=47	N=47	N=47	N=47	N=47	N=47	N=47	N=47	N=47	N=47
	p=,230	p=,434	p=,106	p=,352	p=,858	p=,000	p=,019	p= ---	p=,066	p=,122	p=,001	p=,014	p=,941	p=,642	p=,180	p=,603	p=,247	p=,002	p=,656	p=,920	p=,003	p=,134	p=,024	p=,288	p=,334	p=,699	p=,011	p=,142	p=,289	p=,253	p=,438	p=,680	p=,131	p=,086	p=,172	p=,297	p=,604	p=,611	p=,001	p=,001	p=,746	p=,505	p=,316	p=,042	p=,008	p=,002	p=,225	p=,225	p=,442
VEGFC T0	,0693	-,0060	-,1138	,2601	-,1241	,0212	,2354	,2707	1,0000	,2623	-,0119	,0485	,1634	,1124	-,0455	-,1003	,1665	,2426	-,1935	-,1893	-,0603	-,0762	-,1297	-,2490	,1947	,2056	-,0884	-,1354	,1456	,0496	,0336	-,0107	-,0166	,0576	-,2088	,0235	-,0500	-,1158	-,0765	-,1349	,0801	,0923	,1447	-,2000	-,2804	-,2553	-,0595	,0117	-,1037
	N=47	N=47	N=47	N=47	N=47	N=47	N=47	N=47	N=47	N=47	N=47	N=47	N=47	N=47	N=47	N=47	N=47	N=47	N=47	N=47	N=47	N=47	N=47	N=47	N=47	N=47	N=47	N=47	N=47	N=47	N=47	N=47	N=47	N=47	N=47	N=47	N=47	N=47	N=47	N=47	N=47	N=47	N=47	N=47	N=47	N=47	N=47	N=47	N=47
	p=,644	p=,968	p=,446	p=,077	p=,406	p=,887	p=,111	p=,066	p= ---	p=,075	p=,937	p=,746	p=,273	p=,452	p=,761	p=,502	p=,263	p=,100	p=,193	p=,203	p=,687	p=,611	p=,385	p=,091	p=,190	p=,166	p=,555	p=,364	p=,329	p=,741	p=,823	p=,943	p=,912	p=,700	p=,159	p=,876	p=,738	p=,438	p=,609	p=,366	p=,593	p=,537	p=,332	p=,178	p=,056	p=,083	p=,691	p=,938	p=,488
VEGF T3M	,2989	,2375	,0268	-,1656	,0994	-,3197	-,0296	-,2285	,2623	1,0000	-,3739	-,3600	,2181	,1686	-,0508	-,0466	,0058	-,1974	-,1239	-,1412	-,1260	-,0420	-,0994	-,1984	-,0444	,0851	,1675	,1074	-,1570	-,1541	,0204	,0036	-,1838	-,1966	,1726	,2168	,0445	-,0077	,3389	,3184	-,0309	-,1647	-,2273	,0104	,0473	-,0133	,3181	,3744	-,0812
	N=47	N=47	N=47	N=47	N=47	N=47	N=47	N=47	N=47	N=47	N=47	N=47	N=47	N=47	N=47	N=47	N=47	N=47	N=47	N=47	N=47	N=47	N=47	N=47	N=47	N=47	N=47	N=47	N=47	N=47	N=47	N=47	N=47	N=47	N=47	N=47	N=47	N=47	N=47	N=47	N=47	N=47	N=47	N=47	N=47	N=47	N=47	N=47	N=47
	p=,041	p=,108	p=,858	p=,266	p=,506	p=,028	p=,843	p=,122	p=,075	p= ---	p=,010	p=,013	p=,141	p=,257	p=,734	p=,756	p=,969	p=,183	p=,407	p=,344	p=,399	p=,779	p=,506	p=,181	p=,767	p=,570	p=,261	p=,472	p=,292	p=,301	p=,892	p=,981	p=,216	p=,185	p=,246	p=,143	p=,766	p=,959	p=,020	p=,029	p=,836	p=,269	p=,124	p=,945	p=,752	p=,929	p=,029	p=,010	p=,587
IL6 T0	-,3036	-,2255	-,1529	,0460	-,1417	,4454	,2827	,4532	-,0119	-,3739	1,0000	,8110	,1530	,1926	,2667	,1633	,0673	,1861	,1014	,2867	,3239	,1113	,2762	,1789	-,0458	-,1244	-,0010	-,0155	,1559	,1781	,0828	,1510	,4380	,4372	-,4480	-,3939	,0320	,0180	-,4763	-,4612	-,1771	-,0498	,1542	,0270	-,1740	-,1725	-,3995	-,3925	,1351
	N=47	N=47	N=47	N=47	N=47	N=47	N=47	N=47	N=47	N=47	N=47	N=47	N=47	N=47	N=47	N=47	N=47	N=47	N=47	N=47	N=47	N=47	N=47	N=47	N=47	N=47	N=47	N=47	N=47	N=47	N=47	N=47	N=47	N=47	N=47	N=47	N=47	N=47	N=47	N=47	N=47	N=47	N=47	N=47	N=47	N=47	N=47	N=47	N=47
	p=,038	p=,128	p=,305	p=,759	p=,342	p=,002	p=,054	p=,001	p=,937	p=,010	p= ---	p=,000	p=,305	p=,195	p=,070	p=,273	p=,653	p=,210	p=,498	p=,051	p=,026	p=,456	p=,060	p=,229	p=,760	p=,405	p=,995	p=,917	p=,295	p=,231	p=,580	p=,311	p=,002	p=,002	p=,002	p=,006	p=,831	p=,904	p=,001	p=,001	p=,234	p=,740	p=,301	p=,857	p=,242	p=,246	p=,005	p=,006	p=,365
IL6 T3M	-,0715	,0265	-,1568	,0151	-,0522	,3473	,2222	,3545	,0485	-,3600	,8110	1,0000	,1304	,2061	,1936	,0571	,1033	,1917	,0121	,1872	,2281	,0494	,2466	,0791	-,0219	-,1551	,0418	-,0687	,2050	,2137	,1738	,3201	,2735	,3219	-,4319	-,3289	-,0941	-,0880	-,2653	-,2845	-,1457	-,0686	,1395	,0805	-,0324	-,0958	-,3925	-,3436	,0781
	N=47	N=47	N=47	N=47	N=47	N=47	N=47	N=47	N=47	N=47	N=47	N=47	N=47	N=47	N=47	N=47	N=47	N=47	N=47	N=47	N=47	N=47	N=47	N=47	N=47	N=47	N=47	N=47	N=47	N=47	N=47	N=47	N=47	N=47	N=47	N=47	N=47	N=47	N=47	N=47	N=47	N=47	N=47	N=47	N=47	N=47	N=47	N=47	N=47
	p=,633	p=,860	p=,292	p=,920	p=,727	p=,017	p=,133	p=,014	p=,746	p=,013	p=,000	p= ---	p=,382	p=,164	p=,192	p=,703	p=,489	p=,197	p=,936	p=,208	p=,123	p=,742	p=,095	p=,597	p=,884	p=,298	p=,780	p=,646	p=,167	p=,149	p=,243	p=,028	p=,063	p=,027	p=,002	p=,024	p=,529	p=,557	p=,071	p=,053	p=,329	p=,647	p=,350	p=,591	p=,829	p=,522	p=,006	p=,018	p=,602
FGF T0	-,0396	-,0800	-,2459	-,0479	,0486	-,0032	,1635	-,0112	,1634	,2181	,1530	,1304	1,0000	,9196	,4656	,4174	,2446	,0942	,0264	,0348	,0082	-,3819	,0380	-,0572	,0421	,1044	,1175	,1200	,2036	,1022	-,0914	-,0691	,3176	,3867	-,2935	-,1303	-,0335	-,1233	-,1488	-,1709	-,1619	-,1461	-,1710	,0009	,1546	,1911	-,0965	-,0976	,0547
	N=47	N=47	N=47	N=47	N=47	N=47	N=47	N=47	N=47	N=47	N=47	N=47	N=47	N=47	N=47	N=47	N=47	N=47	N=47	N=47	N=47	N=47	N=47	N=47	N=47	N=47	N=47	N=47	N=47	N=47	N=47	N=47	N=47	N=47	N=47	N=47	N=47	N=47	N=47	N=47	N=47	N=47	N=47	N=47	N=47	N=47	N=47	N=47	N=47
	p=,791	p=,593	p=,096	p=,749	p=,746	p=,983	p=,272	p=,941	p=,273	p=,141	p=,305	p=,382	p= ---	p=0,00	p=,001	p=,004	p=,098	p=,529	p=,860	p=,816	p=,956	p=,008	p=,800	p=,703	p=,779	p=,485	p=,431	p=,422	p=,170	p=,494	p=,541	p=,644	p=,030	p=,007	p=,045	p=,383	p=,823	p=,409	p=,318	p=,251	p=,277	p=,327	p=,250	p=,995	p=,299	p=,198	p=,519	p=,514	p=,715
FGF T3M	,0346	-,0127	-,1551	-,0741	,0356	,0761	,1099	,0697	,1124	,1686	,1926	,2061	,9196	1,0000	,4028	,3411	,2224	,1813	-,0408	,0493	,1298	-,3370	,1355	-,0377	,0414	,0367	,0855	,1209	,1833	,0539	-,0050	-,0222	,2712	,3017	-,3339	-,1371	-,1269	-,1564	-,2409	-,2495	-,0488	-,0804	-,2013	-,0830	,1126	,1396	-,1160	-,0801	,0970
	N=47	N=47	N=47	N=47	N=47	N=47	N=47	N=47	N=47	N=47	N=47	N=47	N=47	N=47	N=47	N=47	N=47	N=47	N=47	N=47	N=47	N=47	N=47	N=47	N=47	N=47	N=47	N=47	N=47	N=47	N=47	N=47	N=47	N=47	N=47	N=47	N=47	N=47	N=47	N=47	N=47	N=47	N=47	N=47	N=47	N=47	N=47	N=47	N=47
	p=,817	p=,933	p=,298	p=,621	p=,812	p=,611	p=,462	p=,642	p=,452	p=,257	p=,195	p=,164	p=0,00	p= ---	p=,005	p=,019	p=,133	p=,223	p=,786	p=,742	p=,385	p=,021	p=,364	p=,801	p=,782	p=,806	p=,568	p=,418	p=,217	p=,719	p=,973	p=,882	p=,065	p=,039	p=,022	p=,358	p=,395	p=,294	p=,103	p=,091	p=,745	p=,591	p=,175	p=,579	p=,451	p=,349	p=,437	p=,592	p=,516
FGF23 T0	-,0254	-,0156	,0210	-,1241	,0892	-,0163	,3294	,1992	-,0455	-,0508	,2667	,1936	,4656	,4028	1,0000	,9034	,5192	,3134	,1919	,2322	,0848	-,1798	,1580	,1700	,2178	,0440	,1846	,3016	,0183	-,0156	-,2168	-,2340	,2566	,3176	,0488	,1539	-,0329	-,0577	-,1687	-,1795	-,2230	-,1277	,0154	,0539	,2590	,2318	-,0286	-,0962	,0642
	N=47	N=47	N=47	N=47	N=47	N=47	N=47	N=47	N=47	N=47	N=47	N=47	N=47	N=47	N=47	N=47	N=47	N=47	N=47	N=47	N=47	N=47	N=47	N=47	N=47	N=47	N=47	N=47	N=47	N=47	N=47	N=47	N=47	N=47	N=47	N=47	N=47	N=47	N=47	N=47	N=47	N=47	N=47	N=47	N=47	N=47	N=47	N=47	N=47
	p=,866	p=,917	p=,888	p=,406	p=,551	p=,914	p=,024	p=,180	p=,761	p=,734	p=,070	p=,192	p=,001	p=,005	p= ---	p=,000	p=,000	p=,032	p=,196	p=,116	p=,571	p=,226	p=,289	p=,253	p=,141	p=,769	p=,214	p=,039	p=,903	p=,917	p=,143	p=,113	p=,082	p=,030	p=,744	p=,302	p=,826	p=,700	p=,257	p=,227	p=,132	p=,392	p=,918	p=,719	p=,079	p=,117	p=,848	p=,520	p=,668
FGF23 T3M	-,0842	-,0392	,0284	-,1562	,1269	-,0973	,3212	,0777	-,1003	-,0466	,1633	,0571	,4174	,3411	,9034	1,0000	,4788	,2399	,1331	,1666	,0212	-,1997	-,0605	,0219	,2852	,1113	,1048	,3060	,0640	,0565	-,3134	-,3232	,2255	,2673	,0308	,2016	-,0511	-,0769	-,1769	-,1871	-,3070	-,2077	,0552	,1399	,4011	,3438	-,0614	-,0810	,0383
	N=47	N=47	N=47	N=47	N=47	N=47	N=47	N=47	N=47	N=47	N=47	N=47	N=47	N=47	N=47	N=47	N=47	N=47	N=47	N=47	N=47	N=47	N=47	N=47	N=47	N=47	N=47	N=47	N=47	N=47	N=47	N=47	N=47	N=47	N=47	N=47	N=47	N=47	N=47	N=47	N=47	N=47	N=47	N=47	N=47	N=47	N=47	N=47	N=47
	p=,574	p=,794	p=,850	p=,294	p=,395	p=,515	p=,028	p=,603	p=,502	p=,756	p=,273	p=,703	p=,004	p=,019	p=,000	p= ---	p=,001	p=,104	p=,372	p=,263	p=,887	p=,178	p=,686	p=,884	p=,052	p=,456	p=,483	p=,036	p=,669	p=,706	p=,032	p=,027	p=,128	p=,069	p=,837	p=,174	p=,733	p=,608	p=,234	p=,208	p=,036	p=,161	p=,712	p=,348	p=,005	p=,018	p=,682	p=,589	p=,798
IL1betaT0	-,1719	-,1330	,0688	,1763	,0615	-,1792	,2944	,1723	,1665	,0058	,0673	,1033	,2446	,2224	,5192	,4788	1,0000	,5380	-,0339	-,0926	,1693	-,0221	,1173	,0328	,3543	,3766	-,0609	,0495	-,1494	-,2053	-,3157	-,1734	,1741	,1611	,0639	,0027	,0405	,0179	-,1634	-,0747	-,1360	-,0845	,0357	-,0953	,0881	,0654	-,1074	-,0219	,2789
	N=47	N=47	N=47	N=47	N=47	N=47	N=47	N=47	N=47	N=47	N=47	N=47	N=47	N=47	N=47	N=47	N=47	N=47	N=47	N=47	N=47	N=47	N=47	N=47	N=47	N=47	N=47	N=47	N=47	N=47	N=47	N=47	N=47	N=47	N=47	N=47	N=47	N=47	N=47	N=47	N=47	N=47	N=47	N=47	N=47	N=47	N=47	N=47	N=47
	p=,248	p=,373	p=,646	p=,236	p=,681	p=,228	p=,045	p=,247	p=,263	p=,969	p=,653	p=,489	p=,098	p=,133	p=,000	p=,001	p= ---	p=,000	p=,821	p=,536	p=,255	p=,883	p=,432	p=,827	p=,015	p=,009	p=,684	p=,741	p=,316	p=,166	p=,031	p=,244	p=,242	p=,279	p=,670	p=,985	p=,787	p=,905	p=,273	p=,618	p=,362	p=,572	p=,812	p=,524	p=,556	p=,662	p=,472	p=,884	p=,058
IL1betaT3M	-,2182	-,1718	,3165	,3602	,0640	,1658	,3206	,4460	,2426	-,1974	,1861	,1917	,0942	,1813	,3134	,2399	,5380	1,0000	-,1973	,0517	,3389	,1276	,2574	,0861	,2869	,1323	-,3840	-,3390	-,1024	-,1951	,1535	-,1453	,1241	,1147	-,0636	,1527	,0361	-,1113	-,2597	-,2065	-,0659	-,0822	,0042	-,2307	-,0722	-,0658	-,0886	,0452	,1547
	N=47	N=47	N=47	N=47	N=47	N=47	N=47	N=47	N=47	N=47	N=47	N=47	N=47	N=47	N=47	N=47	N=47	N=47	N=47	N=47	N=47	N=47	N=47	N=47	N=47	N=47	N=47	N=47	N=47	N=47	N=47	N=47	N=47	N=47	N=47	N=47	N=47	N=47	N=47	N=47	N=47	N=47	N=47	N=47	N=47	N=47	N=47	N=47	N=47
	p=,141	p=,248	p=,030	p=,013	p=,669	p=,265	p=,028	p=,002	p=,100	p=,183	p=,210	p=,197	p=,529	p=,223	p=,032	p=,104	p=,000	p= ---	p=,184	p=,730	p=,020	p=,393	p=,081	p=,565	p=,051	p=,375	p=,008	p=,020	p=,493	p=,189	p=,303	p=,330	p=,406	p=,443	p=,671	p=,306	p=,810	p=,456	p=,078	p=,164	p=,660	p=,583	p=,978	p=,119	p=,630	p=,660	p=,554	p=,763	p=,299
HIF T0	-,0040	,0255	-,0249	,1369	,0967	-,0633	-,0315	-,0666	-,1935	-,1239	,1014	,0121	,0264	-,0408	,1919	,1331	-,0339	-,1973	1,0000	,5841	,1260	-,0284	,1103	-,0012	-,0584	,0589	,2328	,1281	,3077	,3367	-,2807	-,1766	,0469	,0439	,1897	-,1147	-,0649	-,0442	,0136	,0823	-,0508	,0171	,1179	,0107	-,0989	-,0444	-,0418	-,0816	-,2968
	N=47	N=47	N=47	N=47	N=47	N=47	N=47	N=47	N=47	N=47	N=47	N=47	N=47	N=47	N=47	N=47	N=47	N=47	N=47	N=47	N=47	N=47	N=47	N=47	N=47	N=47	N=47	N=47	N=47	N=47	N=47	N=47	N=47	N=47	N=47	N=47	N=47	N=47	N=47	N=47	N=47	N=47	N=47	N=47	N=47	N=47	N=47	N=47	N=47
	p=,979	p=,865	p=,868	p=,359	p=,518	p=,673	p=,834	p=,656	p=,193	p=,407	p=,498	p=,936	p=,860	p=,786	p=,196	p=,372	p=,821	p=,184	p= ---	p=,000	p=,399	p=,850	p=,460	p=,994	p=,696	p=,694	p=,115	p=,391	p=,035	p=,021	p=,056	p=,235	p=,754	p=,769	p=,202	p=,443	p=,665	p=,768	p=,928	p=,582	p=,734	p=,909	p=,430	p=,943	p=,509	p=,767	p=,780	p=,586	p=,043
HIF1 T3M	,1630	,1994	,0323	-,1031	,1189	-,0010	,0227	,0151	-,1893	-,1412	,2867	,1872	,0348	,0493	,2322	,1666	-,0926	,0517	,5841	1,0000	,3354	,2201	,0447	,0382	-,0738	-,0746	,2245	,2581	,1944	,2288	-,1957	-,1043	,1728	,1863	,1140	-,0831	,0042	,0070	-,0511	-,0202	-,1041	-,0466	,3224	,1109	-,1598	,0245	-,0264	,0556	,0189
	N=47	N=47	N=47	N=47	N=47	N=47	N=47	N=47	N=47	N=47	N=47	N=47	N=47	N=47	N=47	N=47	N=47	N=47	N=47	N=47	N=47	N=47	N=47	N=47	N=47	N=47	N=47	N=47	N=47	N=47	N=47	N=47	N=47	N=47	N=47	N=47	N=47	N=47	N=47	N=47	N=47	N=47	N=47	N=47	N=47	N=47	N=47	N=47	N=47
	p=,274	p=,179	p=,830	p=,490	p=,426	p=,994	p=,880	p=,920	p=,203	p=,344	p=,051	p=,208	p=,816	p=,742	p=,116	p=,263	p=,536	p=,730	p=,000	p= ---	p=,021	p=,137	p=,766	p=,799	p=,622	p=,618	p=,129	p=,080	p=,190	p=,122	p=,187	p=,485	p=,245	p=,210	p=,445	p=,578	p=,978	p=,963	p=,733	p=,893	p=,486	p=,756	p=,027	p=,458	p=,283	p=,870	p=,860	p=,710	p=,899
IL 12 T0	-,2346	-,2015	,3496	-,0070	-,0925	,2846	-,0070	,4233	-,0603	-,1260	,3239	,2281	,0082	,1298	,0848	,0212	,1693	,3389	,1260	,3354	1,0000	,4863	,0445	,0380	,1118	,0105	-,1984	-,1383	-,1877	-,0840	-,0203	-,0564	,0592	-,0024	-,0954	-,1467	,0281	,0160	-,3723	-,2703	,1532	,1075	-,0893	-,1189	-,4182	-,3963	-,0073	,0492	,1477
	N=47	N=47	N=47	N=47	N=47	N=47	N=47	N=47	N=47	N=47	N=47	N=47	N=47	N=47	N=47	N=47	N=47	N=47	N=47	N=47	N=47	N=47	N=47	N=47	N=47	N=47	N=47	N=47	N=47	N=47	N=47	N=47	N=47	N=47	N=47	N=47	N=47	N=47	N=47	N=47	N=47	N=47	N=47	N=47	N=47	N=47	N=47	N=47	N=47
	p=,113	p=,174	p=,016	p=,963	p=,537	p=,053	p=,963	p=,003	p=,687	p=,399	p=,026	p=,123	p=,956	p=,385	p=,571	p=,887	p=,255	p=,020	p=,399	p=,021	p= ---	p=,001	p=,766	p=,800	p=,454	p=,944	p=,181	p=,354	p=,206	p=,575	p=,892	p=,707	p=,693	p=,987	p=,523	p=,325	p=,851	p=,915	p=,010	p=,066	p=,304	p=,472	p=,551	p=,426	p=,003	p=,006	p=,961	p=,743	p=,322
IL12 T3M	,0179	-,0181	,2000	,1646	-,1542	,0826	-,0561	,2220	-,0762	-,0420	,1113	,0494	-,3819	-,3370	-,1798	-,1997	-,0221	,1276	-,0284	,2201	,4863	1,0000	-,0503	,1307	-,1300	-,1682	-,2071	-,0843	-,1267	-,0206	-,0363	-,0113	-,0354	-,1063	,1100	,0613	-,0971	,0153	-,0404	-,0274	-,0157	-,0715	-,1144	-,1304	-,3290	-,3868	,2547	,3281	,1233
	N=47	N=47	N=47	N=47	N=47	N=47	N=47	N=47	N=47	N=47	N=47	N=47	N=47	N=47	N=47	N=47	N=47	N=47	N=47	N=47	N=47	N=47	N=47	N=47	N=47	N=47	N=47	N=47	N=47	N=47	N=47	N=47	N=47	N=47	N=47	N=47	N=47	N=47	N=47	N=47	N=47	N=47	N=47	N=47	N=47	N=47	N=47	N=47	N=47
	p=,905	p=,904	p=,178	p=,269	p=,301	p=,581	p=,708	p=,134	p=,611	p=,779	p=,456	p=,742	p=,008	p=,021	p=,226	p=,178	p=,883	p=,393	p=,850	p=,137	p=,001	p= ---	p=,737	p=,381	p=,384	p=,258	p=,163	p=,573	p=,396	p=,890	p=,809	p=,940	p=,813	p=,477	p=,462	p=,682	p=,516	p=,919	p=,787	p=,855	p=,917	p=,633	p=,444	p=,382	p=,024	p=,007	p=,084	p=,024	p=,409
pH ven T0	-,0744	-,0406	,3373	,1445	-,0196	,3028	,1437	,3283	-,1297	-,0994	,2762	,2466	,0380	,1355	,1580	-,0605	,1173	,2574	,1103	,0447	,0445	-,0503	1,0000	,5359	-,0720	-,0731	-,1523	-,0839	,0321	-,1112	,1337	,1141	,1419	,1023	,0148	-,0172	,2085	,1467	-,0220	,0637	,1997	,1500	-,1609	-,2787	-,0841	-,1014	,0850	-,0172	,1574
	N=47	N=47	N=47	N=47	N=47	N=47	N=47	N=47	N=47	N=47	N=47	N=47	N=47	N=47	N=47	N=47	N=47	N=47	N=47	N=47	N=47	N=47	N=47	N=47	N=47	N=47	N=47	N=47	N=47	N=47	N=47	N=47	N=47	N=47	N=47	N=47	N=47	N=47	N=47	N=47	N=47	N=47	N=47	N=47	N=47	N=47	N=47	N=47	N=47
	p=,619	p=,786	p=,020	p=,332	p=,896	p=,039	p=,335	p=,024	p=,385	p=,506	p=,060	p=,095	p=,800	p=,364	p=,289	p=,686	p=,432	p=,081	p=,460	p=,766	p=,766	p=,737	p= ---	p=,000	p=,631	p=,625	p=,307	p=,575	p=,830	p=,457	p=,370	p=,445	p=,341	p=,494	p=,922	p=,909	p=,160	p=,325	p=,883	p=,671	p=,178	p=,314	p=,280	p=,058	p=,574	p=,498	p=,570	p=,909	p=,291
pH ven T3M	,0262	-,0616	,2599	,1667	,0232	,1160	-,0591	,1582	-,2490	-,1984	,1789	,0791	-,0572	-,0377	,1700	,0219	,0328	,0861	-,0012	,0382	,0380	,1307	,5359	1,0000	-,2190	-,3275	-,0189	,0432	-,0554	-,1520	-,0610	,0034	,1585	,1332	,1541	-,0489	,2086	,2078	,1078	,1365	,0926	,1664	-,0624	-,0602	-,0768	-,0500	,1059	,0516	,1795
	N=47	N=47	N=47	N=47	N=47	N=47	N=47	N=47	N=47	N=47	N=47	N=47	N=47	N=47	N=47	N=47	N=47	N=47	N=47	N=47	N=47	N=47	N=47	N=47	N=47	N=47	N=47	N=47	N=47	N=47	N=47	N=47	N=47	N=47	N=47	N=47	N=47	N=47	N=47	N=47	N=47	N=47	N=47	N=47	N=47	N=47	N=47	N=47	N=47
	p=,861	p=,681	p=,078	p=,263	p=,877	p=,437	p=,693	p=,288	p=,091	p=,181	p=,229	p=,597	p=,703	p=,801	p=,253	p=,884	p=,827	p=,565	p=,994	p=,799	p=,800	p=,381	p=,000	p= ---	p=,139	p=,025	p=,900	p=,773	p=,712	p=,308	p=,684	p=,982	p=,287	p=,372	p=,301	p=,744	p=,159	p=,161	p=,471	p=,360	p=,536	p=,264	p=,677	p=,688	p=,608	p=,738	p=,479	p=,731	p=,227
lactatesT0	-,1049	-,0204	-,0066	-,3190	,0089	-,2340	-,0135	,1440	,1947	-,0444	-,0458	-,0219	,0421	,0414	,2178	,2852	,3543	,2869	-,0584	-,0738	,1118	-,1300	-,0720	-,2190	1,0000	,6240	-,1577	,0221	,0233	,0816	-,2228	-,3243	-,1515	-,1774	,0238	,0130	-,0318	-,0171	-,1278	-,0652	,0550	-,0840	-,1049	-,0915	-,2293	-,2373	-,3284	-,2568	,1195
	N=47	N=47	N=47	N=47	N=47	N=47	N=47	N=47	N=47	N=47	N=47	N=47	N=47	N=47	N=47	N=47	N=47	N=47	N=47	N=47	N=47	N=47	N=47	N=47	N=47	N=47	N=47	N=47	N=47	N=47	N=47	N=47	N=47	N=47	N=47	N=47	N=47	N=47	N=47	N=47	N=47	N=47	N=47	N=47	N=47	N=47	N=47	N=47	N=47
	p=,483	p=,892	p=,965	p=,029	p=,952	p=,113	p=,928	p=,334	p=,190	p=,767	p=,760	p=,884	p=,779	p=,782	p=,141	p=,052	p=,015	p=,051	p=,696	p=,622	p=,454	p=,384	p=,631	p=,139	p= ---	p=,000	p=,290	p=,883	p=,876	p=,586	p=,132	p=,026	p=,309	p=,233	p=,874	p=,931	p=,832	p=,909	p=,392	p=,663	p=,714	p=,574	p=,483	p=,541	p=,121	p=,108	p=,024	p=,081	p=,424
lactatesT3M	-,1806	-,0803	-,1140	-,1560	,0259	-,1922	,1669	,0580	,2056	,0851	-,1244	-,1551	,1044	,0367	,0440	,1113	,3766	,1323	,0589	-,0746	,0105	-,1682	-,0731	-,3275	,6240	1,0000	-,0350	-,1412	,0825	,0772	-,4256	-,2437	-,2702	-,2827	,1381	-,0301	,0226	,0208	,0082	,0955	,2889	,2146	-,0513	-,1115	-,2201	-,2333	-,2375	-,1973	,0364
	N=47	N=47	N=47	N=47	N=47	N=47	N=47	N=47	N=47	N=47	N=47	N=47	N=47	N=47	N=47	N=47	N=47	N=47	N=47	N=47	N=47	N=47	N=47	N=47	N=47	N=47	N=47	N=47	N=47	N=47	N=47	N=47	N=47	N=47	N=47	N=47	N=47	N=47	N=47	N=47	N=47	N=47	N=47	N=47	N=47	N=47	N=47	N=47	N=47
	p=,224	p=,592	p=,446	p=,295	p=,863	p=,196	p=,262	p=,699	p=,166	p=,570	p=,405	p=,298	p=,485	p=,806	p=,769	p=,456	p=,009	p=,375	p=,694	p=,618	p=,944	p=,258	p=,625	p=,025	p=,000	p= ---	p=,815	p=,344	p=,581	p=,606	p=,003	p=,099	p=,066	p=,054	p=,354	p=,841	p=,880	p=,889	p=,956	p=,523	p=,049	p=,147	p=,732	p=,456	p=,137	p=,115	p=,108	p=,184	p=,808
Alb T0	,3204	,2681	-,2473	-,3671	,0014	-,2460	-,0040	-,3683	-,0884	,1675	-,0010	,0418	,1175	,0855	,1846	,1048	-,0609	-,3840	,2328	,2245	-,1984	-,2071	-,1523	-,0189	-,1577	-,0350	1,0000	,7066	,0913	,2168	-,2458	-,1170	-,0201	,0357	,1062	-,0571	,1139	,0618	,2732	,1973	-,0249	,0609	,3520	,2422	-,0738	,0027	-,0315	-,1126	-,0531
	N=47	N=47	N=47	N=47	N=47	N=47	N=47	N=47	N=47	N=47	N=47	N=47	N=47	N=47	N=47	N=47	N=47	N=47	N=47	N=47	N=47	N=47	N=47	N=47	N=47	N=47	N=47	N=47	N=47	N=47	N=47	N=47	N=47	N=47	N=47	N=47	N=47	N=47	N=47	N=47	N=47	N=47	N=47	N=47	N=47	N=47	N=47	N=47	N=47
	p=,028	p=,068	p=,094	p=,011	p=,992	p=,096	p=,979	p=,011	p=,555	p=,261	p=,995	p=,780	p=,431	p=,568	p=,214	p=,483	p=,684	p=,008	p=,115	p=,129	p=,181	p=,163	p=,307	p=,900	p=,290	p=,815	p= ---	p=,000	p=,542	p=,143	p=,096	p=,433	p=,893	p=,812	p=,478	p=,703	p=,446	p=,680	p=,063	p=,184	p=,868	p=,684	p=,015	p=,101	p=,622	p=,985	p=,833	p=,451	p=,723
Alb T3M	,3955	,3615	-,1536	-,4077	-,1406	-,1738	-,0829	-,2177	-,1354	,1074	-,0155	-,0687	,1200	,1209	,3016	,3060	,0495	-,3390	,1281	,2581	-,1383	-,0843	-,0839	,0432	,0221	-,1412	,7066	1,0000	,0653	,1333	-,2148	-,0728	,0541	,0937	,0868	,1385	,1257	,1214	,1479	,0671	-,1517	-,0824	,2636	,1748	,0280	,0417	,0401	-,0468	,1724
	N=47	N=47	N=47	N=47	N=47	N=47	N=47	N=47	N=47	N=47	N=47	N=47	N=47	N=47	N=47	N=47	N=47	N=47	N=47	N=47	N=47	N=47	N=47	N=47	N=47	N=47	N=47	N=47	N=47	N=47	N=47	N=47	N=47	N=47	N=47	N=47	N=47	N=47	N=47	N=47	N=47	N=47	N=47	N=47	N=47	N=47	N=47	N=47	N=47
	p=,006	p=,013	p=,303	p=,004	p=,346	p=,243	p=,579	p=,142	p=,364	p=,472	p=,917	p=,646	p=,422	p=,418	p=,039	p=,036	p=,741	p=,020	p=,391	p=,080	p=,354	p=,573	p=,575	p=,773	p=,883	p=,344	p=,000	p= ---	p=,663	p=,372	p=,147	p=,627	p=,718	p=,531	p=,562	p=,353	p=,400	p=,416	p=,321	p=,654	p=,309	p=,582	p=,073	p=,240	p=,852	p=,781	p=,789	p=,755	p=,247
Na+ T0	,0749	,1567	-,2006	,0944	-,1216	,0332	,0185	-,1578	,1456	-,1570	,1559	,2050	,2036	,1833	,0183	,0640	-,1494	-,1024	,3077	,1944	-,1877	-,1267	,0321	-,0554	,0233	,0825	,0913	,0653	1,0000	,9000	-,0780	-,0849	-,0162	,0404	,0072	,0516	-,1167	-,1478	,1619	,1323	-,0887	,0115	,2489	,0351	-,0127	-,0573	-,1312	-,1376	-,1729
	N=47	N=47	N=47	N=47	N=47	N=47	N=47	N=47	N=47	N=47	N=47	N=47	N=47	N=47	N=47	N=47	N=47	N=47	N=47	N=47	N=47	N=47	N=47	N=47	N=47	N=47	N=47	N=47	N=47	N=47	N=47	N=47	N=47	N=47	N=47	N=47	N=47	N=47	N=47	N=47	N=47	N=47	N=47	N=47	N=47	N=47	N=47	N=47	N=47
	p=,617	p=,293	p=,176	p=,528	p=,416	p=,825	p=,902	p=,289	p=,329	p=,292	p=,295	p=,167	p=,170	p=,217	p=,903	p=,669	p=,316	p=,493	p=,035	p=,190	p=,206	p=,396	p=,830	p=,712	p=,876	p=,581	p=,542	p=,663	p= ---	p=,000	p=,602	p=,570	p=,914	p=,787	p=,962	p=,730	p=,435	p=,321	p=,277	p=,375	p=,553	p=,939	p=,092	p=,815	p=,933	p=,702	p=,379	p=,356	p=,245
Na+ T3M	,0259	,1189	-,2452	-,0588	-,1299	,0407	-,0434	-,1702	,0496	-,1541	,1781	,2137	,1022	,0539	-,0156	,0565	-,2053	-,1951	,3367	,2288	-,0840	-,0206	-,1112	-,1520	,0816	,0772	,2168	,1333	,9000	1,0000	-,1467	-,2235	-,0413	,0342	,0673	-,0275	-,0469	-,0745	,1316	,0811	-,1233	-,0016	,3230	,1503	-,1500	-,1955	-,1906	-,2113	-,2498
	N=47	N=47	N=47	N=47	N=47	N=47	N=47	N=47	N=47	N=47	N=47	N=47	N=47	N=47	N=47	N=47	N=47	N=47	N=47	N=47	N=47	N=47	N=47	N=47	N=47	N=47	N=47	N=47	N=47	N=47	N=47	N=47	N=47	N=47	N=47	N=47	N=47	N=47	N=47	N=47	N=47	N=47	N=47	N=47	N=47	N=47	N=47	N=47	N=47
	p=,863	p=,426	p=,097	p=,694	p=,384	p=,786	p=,772	p=,253	p=,741	p=,301	p=,231	p=,149	p=,494	p=,719	p=,917	p=,706	p=,166	p=,189	p=,021	p=,122	p=,575	p=,890	p=,457	p=,308	p=,586	p=,606	p=,143	p=,372	p=,000	p= ---	p=,325	p=,131	p=,783	p=,819	p=,653	p=,854	p=,754	p=,619	p=,378	p=,588	p=,409	p=,991	p=,027	p=,313	p=,314	p=,188	p=,199	p=,154	p=,090
K+ T0	,0597	,0783	-,0348	,1447	-,2141	,3019	-,0989	,1159	,0336	,0204	,0828	,1738	-,0914	-,0050	-,2168	-,3134	-,3157	,1535	-,2807	-,1957	-,0203	-,0363	,1337	-,0610	-,2228	-,4256	-,2458	-,2148	-,0780	-,1467	1,0000	,4630	,0387	,0201	-,3301	,0486	-,1505	-,1615	,0832	,0290	-,0345	-,1557	-,1643	-,1626	,1639	,0758	,0838	-,0290	,0459
	N=47	N=47	N=47	N=47	N=47	N=47	N=47	N=47	N=47	N=47	N=47	N=47	N=47	N=47	N=47	N=47	N=47	N=47	N=47	N=47	N=47	N=47	N=47	N=47	N=47	N=47	N=47	N=47	N=47	N=47	N=47	N=47	N=47	N=47	N=47	N=47	N=47	N=47	N=47	N=47	N=47	N=47	N=47	N=47	N=47	N=47	N=47	N=47	N=47
	p=,690	p=,601	p=,816	p=,332	p=,148	p=,039	p=,508	p=,438	p=,823	p=,892	p=,580	p=,243	p=,541	p=,973	p=,143	p=,032	p=,031	p=,303	p=,056	p=,187	p=,892	p=,809	p=,370	p=,684	p=,132	p=,003	p=,096	p=,147	p=,602	p=,325	p= ---	p=,001	p=,796	p=,893	p=,023	p=,746	p=,313	p=,278	p=,578	p=,847	p=,818	p=,296	p=,270	p=,275	p=,271	p=,613	p=,575	p=,847	p=,759
K+ T3M	,2115	,1938	-,1689	,1108	-,3090	,0960	-,0982	-,0617	-,0107	,0036	,1510	,3201	-,0691	-,0222	-,2340	-,3232	-,1734	-,1453	-,1766	-,1043	-,0564	-,0113	,1141	,0034	-,3243	-,2437	-,1170	-,0728	-,0849	-,2235	,4630	1,0000	,0186	,0026	-,4253	-,0889	-,0233	,0327	,0210	,0038	,0978	,1205	-,1008	-,1543	,2362	,1358	,1694	,0812	,0772
	N=47	N=47	N=47	N=47	N=47	N=47	N=47	N=47	N=47	N=47	N=47	N=47	N=47	N=47	N=47	N=47	N=47	N=47	N=47	N=47	N=47	N=47	N=47	N=47	N=47	N=47	N=47	N=47	N=47	N=47	N=47	N=47	N=47	N=47	N=47	N=47	N=47	N=47	N=47	N=47	N=47	N=47	N=47	N=47	N=47	N=47	N=47	N=47	N=47
	p=,154	p=,192	p=,256	p=,458	p=,035	p=,521	p=,511	p=,680	p=,943	p=,981	p=,311	p=,028	p=,644	p=,882	p=,113	p=,027	p=,244	p=,330	p=,235	p=,485	p=,707	p=,940	p=,445	p=,982	p=,026	p=,099	p=,433	p=,627	p=,570	p=,131	p=,001	p= ---	p=,901	p=,986	p=,003	p=,552	p=,877	p=,827	p=,888	p=,980	p=,513	p=,420	p=,500	p=,301	p=,110	p=,363	p=,255	p=,587	p=,606
Phosph T0	-,0558	-,0742	-,0652	,2129	,0320	,2959	,1848	,2234	-,0166	-,1838	,4380	,2735	,3176	,2712	,2566	,2255	,1741	,1241	,0469	,1728	,0592	-,0354	,1419	,1585	-,1515	-,2702	-,0201	,0541	-,0162	-,0413	,0387	,0186	1,0000	,9339	-,4592	-,4403	,1683	,1120	-,3871	-,4231	-,3276	-,1768	,0775	-,0928	,0576	,1141	-,1246	-,1810	,1122
	N=47	N=47	N=47	N=47	N=47	N=47	N=47	N=47	N=47	N=47	N=47	N=47	N=47	N=47	N=47	N=47	N=47	N=47	N=47	N=47	N=47	N=47	N=47	N=47	N=47	N=47	N=47	N=47	N=47	N=47	N=47	N=47	N=47	N=47	N=47	N=47	N=47	N=47	N=47	N=47	N=47	N=47	N=47	N=47	N=47	N=47	N=47	N=47	N=47
	p=,710	p=,620	p=,663	p=,151	p=,831	p=,043	p=,214	p=,131	p=,912	p=,216	p=,002	p=,063	p=,030	p=,065	p=,082	p=,128	p=,242	p=,406	p=,754	p=,245	p=,693	p=,813	p=,341	p=,287	p=,309	p=,066	p=,893	p=,718	p=,914	p=,783	p=,796	p=,901	p= ---	p=0,00	p=,001	p=,002	p=,258	p=,453	p=,007	p=,003	p=,025	p=,235	p=,605	p=,535	p=,700	p=,445	p=,404	p=,223	p=,453
Phosph T3M	-,0462	-,0450	-,1440	,1319	,0297	,3314	,2343	,2535	,0576	-,1966	,4372	,3219	,3867	,3017	,3176	,2673	,1611	,1147	,0439	,1863	-,0024	-,1063	,1023	,1332	-,1774	-,2827	,0357	,0937	,0404	,0342	,0201	,0026	,9339	1,0000	-,4429	-,3750	,2411	,1388	-,3730	-,4448	-,3824	-,2260	,1205	-,0310	,0252	,1261	-,1313	-,1625	,0905
	N=47	N=47	N=47	N=47	N=47	N=47	N=47	N=47	N=47	N=47	N=47	N=47	N=47	N=47	N=47	N=47	N=47	N=47	N=47	N=47	N=47	N=47	N=47	N=47	N=47	N=47	N=47	N=47	N=47	N=47	N=47	N=47	N=47	N=47	N=47	N=47	N=47	N=47	N=47	N=47	N=47	N=47	N=47	N=47	N=47	N=47	N=47	N=47	N=47
	p=,758	p=,764	p=,334	p=,377	p=,843	p=,023	p=,113	p=,086	p=,700	p=,185	p=,002	p=,027	p=,007	p=,039	p=,030	p=,069	p=,279	p=,443	p=,769	p=,210	p=,987	p=,477	p=,494	p=,372	p=,233	p=,054	p=,812	p=,531	p=,787	p=,819	p=,893	p=,986	p=0,00	p= ---	p=,002	p=,009	p=,103	p=,352	p=,010	p=,002	p=,008	p=,127	p=,420	p=,836	p=,867	p=,398	p=,379	p=,275	p=,545
AG T0	,1229	,1248	,2548	-,0601	,2923	-,2206	-,1219	-,2027	-,2088	,1726	-,4480	-,4319	-,2935	-,3339	,0488	,0308	,0639	-,0636	,1897	,1140	-,0954	,1100	,0148	,1541	,0238	,1381	,1062	,0868	,0072	,0673	-,3301	-,4253	-,4592	-,4429	1,0000	,4471	,0489	,0046	,3898	,4327	,1697	,2093	,0631	,1744	-,0228	,0330	,2189	,1818	-,1478
	N=47	N=47	N=47	N=47	N=47	N=47	N=47	N=47	N=47	N=47	N=47	N=47	N=47	N=47	N=47	N=47	N=47	N=47	N=47	N=47	N=47	N=47	N=47	N=47	N=47	N=47	N=47	N=47	N=47	N=47	N=47	N=47	N=47	N=47	N=47	N=47	N=47	N=47	N=47	N=47	N=47	N=47	N=47	N=47	N=47	N=47	N=47	N=47	N=47
	p=,410	p=,403	p=,084	p=,688	p=,046	p=,136	p=,414	p=,172	p=,159	p=,246	p=,002	p=,002	p=,045	p=,022	p=,744	p=,837	p=,670	p=,671	p=,202	p=,445	p=,523	p=,462	p=,922	p=,301	p=,874	p=,354	p=,478	p=,562	p=,962	p=,653	p=,023	p=,003	p=,001	p=,002	p= ---	p=,002	p=,744	p=,975	p=,007	p=,002	p=,254	p=,158	p=,674	p=,241	p=,879	p=,826	p=,139	p=,221	p=,321
AG T3M	,3054	,2875	,1835	-,1143	-,1850	-,1434	-,0180	-,1553	,0235	,2168	-,3939	-,3289	-,1303	-,1371	,1539	,2016	,0027	,1527	-,1147	-,0831	-,1467	,0613	-,0172	-,0489	,0130	-,0301	-,0571	,1385	,0516	-,0275	,0486	-,0889	-,4403	-,3750	,4471	1,0000	-,0207	-,0042	,3840	,3251	,0830	-,0365	-,0235	-,0128	,2246	,1630	,2431	,3459	,0991
	N=47	N=47	N=47	N=47	N=47	N=47	N=47	N=47	N=47	N=47	N=47	N=47	N=47	N=47	N=47	N=47	N=47	N=47	N=47	N=47	N=47	N=47	N=47	N=47	N=47	N=47	N=47	N=47	N=47	N=47	N=47	N=47	N=47	N=47	N=47	N=47	N=47	N=47	N=47	N=47	N=47	N=47	N=47	N=47	N=47	N=47	N=47	N=47	N=47
	p=,037	p=,050	p=,217	p=,444	p=,213	p=,336	p=,905	p=,297	p=,876	p=,143	p=,006	p=,024	p=,383	p=,358	p=,302	p=,174	p=,985	p=,306	p=,443	p=,578	p=,325	p=,682	p=,909	p=,744	p=,931	p=,841	p=,703	p=,353	p=,730	p=,854	p=,746	p=,552	p=,002	p=,009	p=,002	p= ---	p=,890	p=,977	p=,008	p=,026	p=,579	p=,807	p=,875	p=,932	p=,129	p=,274	p=,100	p=,017	p=,507
Hb T0	-,0128	,0495	,2877	-,1112	-,0163	,1365	,0093	,0777	-,0500	,0445	,0320	-,0941	-,0335	-,1269	-,0329	-,0511	,0405	,0361	-,0649	,0042	,0281	-,0971	,2085	,2086	-,0318	,0226	,1139	,1257	-,1167	-,0469	-,1505	-,0233	,1683	,2411	,0489	-,0207	1,0000	,7619	,0459	,0782	-,1081	,0011	,2248	,1684	-,1813	-,1325	-,0383	-,1414	,1711
	N=47	N=47	N=47	N=47	N=47	N=47	N=47	N=47	N=47	N=47	N=47	N=47	N=47	N=47	N=47	N=47	N=47	N=47	N=47	N=47	N=47	N=47	N=47	N=47	N=47	N=47	N=47	N=47	N=47	N=47	N=47	N=47	N=47	N=47	N=47	N=47	N=47	N=47	N=47	N=47	N=47	N=47	N=47	N=47	N=47	N=47	N=47	N=47	N=47
	p=,932	p=,741	p=,050	p=,457	p=,914	p=,360	p=,951	p=,604	p=,738	p=,766	p=,831	p=,529	p=,823	p=,395	p=,826	p=,733	p=,787	p=,810	p=,665	p=,978	p=,851	p=,516	p=,160	p=,159	p=,832	p=,880	p=,446	p=,400	p=,435	p=,754	p=,313	p=,877	p=,258	p=,103	p=,744	p=,890	p= ---	p=,000	p=,759	p=,601	p=,470	p=,994	p=,129	p=,258	p=,223	p=,375	p=,798	p=,343	p=,250
Hb T3M	-,0156	-,0250	,1657	-,1745	-,1909	,0373	-,0961	,0762	-,1158	-,0077	,0180	-,0880	-,1233	-,1564	-,0577	-,0769	,0179	-,1113	-,0442	,0070	,0160	,0153	,1467	,2078	-,0171	,0208	,0618	,1214	-,1478	-,0745	-,1615	,0327	,1120	,1388	,0046	-,0042	,7619	1,0000	,1485	,1630	,0217	,0806	,2523	,1648	-,1927	-,1462	-,0391	-,1767	,3585
	N=47	N=47	N=47	N=47	N=47	N=47	N=47	N=47	N=47	N=47	N=47	N=47	N=47	N=47	N=47	N=47	N=47	N=47	N=47	N=47	N=47	N=47	N=47	N=47	N=47	N=47	N=47	N=47	N=47	N=47	N=47	N=47	N=47	N=47	N=47	N=47	N=47	N=47	N=47	N=47	N=47	N=47	N=47	N=47	N=47	N=47	N=47	N=47	N=47
	p=,917	p=,868	p=,266	p=,241	p=,199	p=,803	p=,521	p=,611	p=,438	p=,959	p=,904	p=,557	p=,409	p=,294	p=,700	p=,608	p=,905	p=,456	p=,768	p=,963	p=,915	p=,919	p=,325	p=,161	p=,909	p=,889	p=,680	p=,416	p=,321	p=,619	p=,278	p=,827	p=,453	p=,352	p=,975	p=,977	p=,000	p= ---	p=,319	p=,274	p=,885	p=,590	p=,087	p=,268	p=,194	p=,327	p=,794	p=,235	p=,013
RBC T0	,2851	,2629	,0373	-,0834	-,0576	-,2921	-,3314	-,4776	-,0765	,3389	-,4763	-,2653	-,1488	-,2409	-,1687	-,1769	-,1634	-,2597	,0136	-,0511	-,3723	-,0404	-,0220	,1078	-,1278	,0082	,2732	,1479	,1619	,1316	,0832	,0210	-,3871	-,3730	,3898	,3840	,0459	,1485	1,0000	,8969	,1720	-,0464	,1460	,3479	,2332	,1637	,3015	,2321	,0630
	N=47	N=47	N=47	N=47	N=47	N=47	N=47	N=47	N=47	N=47	N=47	N=47	N=47	N=47	N=47	N=47	N=47	N=47	N=47	N=47	N=47	N=47	N=47	N=47	N=47	N=47	N=47	N=47	N=47	N=47	N=47	N=47	N=47	N=47	N=47	N=47	N=47	N=47	N=47	N=47	N=47	N=47	N=47	N=47	N=47	N=47	N=47	N=47	N=47
	p=,052	p=,074	p=,803	p=,577	p=,701	p=,046	p=,023	p=,001	p=,609	p=,020	p=,001	p=,071	p=,318	p=,103	p=,257	p=,234	p=,273	p=,078	p=,928	p=,733	p=,010	p=,787	p=,883	p=,471	p=,392	p=,956	p=,063	p=,321	p=,277	p=,378	p=,578	p=,888	p=,007	p=,010	p=,007	p=,008	p=,759	p=,319	p= ---	p=,000	p=,248	p=,757	p=,328	p=,017	p=,115	p=,272	p=,039	p=,116	p=,674
RBC T3M	,1592	,2125	,0602	-,0579	-,0190	-,3702	-,3208	-,4568	-,1349	,3184	-,4612	-,2845	-,1709	-,2495	-,1795	-,1871	-,0747	-,2065	,0823	-,0202	-,2703	-,0274	,0637	,1365	-,0652	,0955	,1973	,0671	,1323	,0811	,0290	,0038	-,4231	-,4448	,4327	,3251	,0782	,1630	,8969	1,0000	,1242	-,0762	,1402	,2888	,1882	,2027	,2275	,1987	,0424
	N=47	N=47	N=47	N=47	N=47	N=47	N=47	N=47	N=47	N=47	N=47	N=47	N=47	N=47	N=47	N=47	N=47	N=47	N=47	N=47	N=47	N=47	N=47	N=47	N=47	N=47	N=47	N=47	N=47	N=47	N=47	N=47	N=47	N=47	N=47	N=47	N=47	N=47	N=47	N=47	N=47	N=47	N=47	N=47	N=47	N=47	N=47	N=47	N=47
	p=,285	p=,152	p=,688	p=,699	p=,899	p=,010	p=,028	p=,001	p=,366	p=,029	p=,001	p=,053	p=,251	p=,091	p=,227	p=,208	p=,618	p=,164	p=,582	p=,893	p=,066	p=,855	p=,671	p=,360	p=,663	p=,523	p=,184	p=,654	p=,375	p=,588	p=,847	p=,980	p=,003	p=,002	p=,002	p=,026	p=,601	p=,274	p=,000	p= ---	p=,405	p=,611	p=,347	p=,049	p=,205	p=,172	p=,124	p=,181	p=,777
FerritineT0	,0783	,0041	,2308	-,1187	-,1534	,0498	-,2239	,0486	,0801	-,0309	-,1771	-,1457	-,1619	-,0488	-,2230	-,3070	-,1360	-,0659	-,0508	-,1041	,1532	-,0157	,1997	,0926	,0550	,2889	-,0249	-,1517	-,0887	-,1233	-,0345	,0978	-,3276	-,3824	,1697	,0830	-,1081	,0217	,1720	,1242	1,0000	,8152	-,1061	-,0542	-,2430	-,1644	,1378	,0350	,0694
	N=47	N=47	N=47	N=47	N=47	N=47	N=47	N=47	N=47	N=47	N=47	N=47	N=47	N=47	N=47	N=47	N=47	N=47	N=47	N=47	N=47	N=47	N=47	N=47	N=47	N=47	N=47	N=47	N=47	N=47	N=47	N=47	N=47	N=47	N=47	N=47	N=47	N=47	N=47	N=47	N=47	N=47	N=47	N=47	N=47	N=47	N=47	N=47	N=47
	p=,601	p=,978	p=,119	p=,427	p=,303	p=,739	p=,130	p=,746	p=,593	p=,836	p=,234	p=,329	p=,277	p=,745	p=,132	p=,036	p=,362	p=,660	p=,734	p=,486	p=,304	p=,917	p=,178	p=,536	p=,714	p=,049	p=,868	p=,309	p=,553	p=,409	p=,818	p=,513	p=,025	p=,008	p=,254	p=,579	p=,470	p=,885	p=,248	p=,405	p= ---	p=,000	p=,478	p=,718	p=,100	p=,269	p=,356	p=,816	p=,643
FerritineT3M	,0467	-,0571	,1171	,0499	-,0382	,0509	-,0237	,0997	,0923	-,1647	-,0498	-,0686	-,1461	-,0804	-,1277	-,2077	-,0845	-,0822	,0171	-,0466	,1075	-,0715	,1500	,1664	-,0840	,2146	,0609	-,0824	,0115	-,0016	-,1557	,1205	-,1768	-,2260	,2093	-,0365	,0011	,0806	-,0464	-,0762	,8152	1,0000	,1388	-,1111	-,2563	-,1571	,0813	-,0948	-,1247
	N=47	N=47	N=47	N=47	N=47	N=47	N=47	N=47	N=47	N=47	N=47	N=47	N=47	N=47	N=47	N=47	N=47	N=47	N=47	N=47	N=47	N=47	N=47	N=47	N=47	N=47	N=47	N=47	N=47	N=47	N=47	N=47	N=47	N=47	N=47	N=47	N=47	N=47	N=47	N=47	N=47	N=47	N=47	N=47	N=47	N=47	N=47	N=47	N=47
	p=,755	p=,703	p=,433	p=,739	p=,799	p=,734	p=,874	p=,505	p=,537	p=,269	p=,740	p=,647	p=,327	p=,591	p=,392	p=,161	p=,572	p=,583	p=,909	p=,756	p=,472	p=,633	p=,314	p=,264	p=,574	p=,147	p=,684	p=,582	p=,939	p=,991	p=,296	p=,420	p=,235	p=,127	p=,158	p=,807	p=,994	p=,590	p=,757	p=,611	p=,000	p= ---	p=,352	p=,457	p=,082	p=,292	p=,587	p=,526	p=,404
SaO2 T0	,0093	-,0386	-,1666	,0854	-,0738	,0356	,0621	-,1493	,1447	-,2273	,1542	,1395	-,1710	-,2013	,0154	,0552	,0357	,0042	,1179	,3224	-,0893	-,1144	-,1609	-,0624	-,1049	-,0513	,3520	,2636	,2489	,3230	-,1643	-,1008	,0775	,1205	,0631	-,0235	,2248	,2523	,1460	,1402	-,1061	,1388	1,0000	,2442	-,1112	,0253	-,2785	-,2700	-,0192
	N=47	N=47	N=47	N=47	N=47	N=47	N=47	N=47	N=47	N=47	N=47	N=47	N=47	N=47	N=47	N=47	N=47	N=47	N=47	N=47	N=47	N=47	N=47	N=47	N=47	N=47	N=47	N=47	N=47	N=47	N=47	N=47	N=47	N=47	N=47	N=47	N=47	N=47	N=47	N=47	N=47	N=47	N=47	N=47	N=47	N=47	N=47	N=47	N=47
	p=,951	p=,797	p=,263	p=,568	p=,622	p=,812	p=,678	p=,316	p=,332	p=,124	p=,301	p=,350	p=,250	p=,175	p=,918	p=,712	p=,812	p=,978	p=,430	p=,027	p=,551	p=,444	p=,280	p=,677	p=,483	p=,732	p=,015	p=,073	p=,092	p=,027	p=,270	p=,500	p=,605	p=,420	p=,674	p=,875	p=,129	p=,087	p=,328	p=,347	p=,478	p=,352	p= ---	p=,098	p=,457	p=,866	p=,058	p=,066	p=,898
SaO2 T3M	-,1402	-,0127	,0845	-,2693	,2628	-,1029	-,0960	-,2985	-,2000	,0104	,0270	,0805	,0009	-,0830	,0539	,1399	-,0953	-,2307	,0107	,1109	-,1189	-,1304	-,2787	-,0602	-,0915	-,1115	,2422	,1748	,0351	,1503	-,1626	-,1543	-,0928	-,0310	,1744	-,0128	,1684	,1648	,3479	,2888	-,0542	-,1111	,2442	1,0000	,2901	,3317	-,2021	-,1601	,0045
	N=47	N=47	N=47	N=47	N=47	N=47	N=47	N=47	N=47	N=47	N=47	N=47	N=47	N=47	N=47	N=47	N=47	N=47	N=47	N=47	N=47	N=47	N=47	N=47	N=47	N=47	N=47	N=47	N=47	N=47	N=47	N=47	N=47	N=47	N=47	N=47	N=47	N=47	N=47	N=47	N=47	N=47	N=47	N=47	N=47	N=47	N=47	N=47	N=47
	p=,347	p=,932	p=,572	p=,067	p=,074	p=,491	p=,521	p=,042	p=,178	p=,945	p=,857	p=,591	p=,995	p=,579	p=,719	p=,348	p=,524	p=,119	p=,943	p=,458	p=,426	p=,382	p=,058	p=,688	p=,541	p=,456	p=,101	p=,240	p=,815	p=,313	p=,275	p=,301	p=,535	p=,836	p=,241	p=,932	p=,258	p=,268	p=,017	p=,049	p=,718	p=,457	p=,098	p= ---	p=,048	p=,023	p=,173	p=,282	p=,976
kreat T0 mmol/l	,0486	,1015	,0296	,0809	,1357	-,1564	,0815	-,3822	-,2804	,0473	-,1740	-,0324	,1546	,1126	,2590	,4011	,0881	-,0722	-,0989	-,1598	-,4182	-,3290	-,0841	-,0768	-,2293	-,2201	-,0738	,0280	-,0127	-,1500	,1639	,2362	,0576	,0252	-,0228	,2246	-,1813	-,1927	,2332	,1882	-,2430	-,2563	-,1112	,2901	1,0000	,8455	,2054	,1204	-,0707
	N=47	N=47	N=47	N=47	N=47	N=47	N=47	N=47	N=47	N=47	N=47	N=47	N=47	N=47	N=47	N=47	N=47	N=47	N=47	N=47	N=47	N=47	N=47	N=47	N=47	N=47	N=47	N=47	N=47	N=47	N=47	N=47	N=47	N=47	N=47	N=47	N=47	N=47	N=47	N=47	N=47	N=47	N=47	N=47	N=47	N=47	N=47	N=47	N=47
	p=,746	p=,497	p=,843	p=,589	p=,363	p=,294	p=,586	p=,008	p=,056	p=,752	p=,242	p=,829	p=,299	p=,451	p=,079	p=,005	p=,556	p=,630	p=,509	p=,283	p=,003	p=,024	p=,574	p=,608	p=,121	p=,137	p=,622	p=,852	p=,933	p=,314	p=,271	p=,110	p=,700	p=,867	p=,879	p=,129	p=,223	p=,194	p=,115	p=,205	p=,100	p=,082	p=,457	p=,048	p= ---	p=,000	p=,166	p=,420	p=,637
kreat mmol/l	-,0155	,0460	-,0132	-,0017	,2654	-,2822	,0666	-,4368	-,2553	-,0133	-,1725	-,0958	,1911	,1396	,2318	,3438	,0654	-,0658	-,0444	,0245	-,3963	-,3868	-,1014	-,0500	-,2373	-,2333	,0027	,0417	-,0573	-,1955	,0758	,1358	,1141	,1261	,0330	,1630	-,1325	-,1462	,1637	,2027	-,1644	-,1571	,0253	,3317	,8455	1,0000	,1364	,1007	-,0363
	N=47	N=47	N=47	N=47	N=47	N=47	N=47	N=47	N=47	N=47	N=47	N=47	N=47	N=47	N=47	N=47	N=47	N=47	N=47	N=47	N=47	N=47	N=47	N=47	N=47	N=47	N=47	N=47	N=47	N=47	N=47	N=47	N=47	N=47	N=47	N=47	N=47	N=47	N=47	N=47	N=47	N=47	N=47	N=47	N=47	N=47	N=47	N=47	N=47
	p=,918	p=,759	p=,930	p=,991	p=,071	p=,055	p=,656	p=,002	p=,083	p=,929	p=,246	p=,522	p=,198	p=,349	p=,117	p=,018	p=,662	p=,660	p=,767	p=,870	p=,006	p=,007	p=,498	p=,738	p=,108	p=,115	p=,985	p=,781	p=,702	p=,188	p=,613	p=,363	p=,445	p=,398	p=,826	p=,274	p=,375	p=,327	p=,272	p=,172	p=,269	p=,292	p=,866	p=,023	p=,000	p= ---	p=,361	p=,501	p=,809
Chol Cał T0	,1317	,0248	,2084	,1233	-,1516	-,1306	-,1245	-,1804	-,0595	,3181	-,3995	-,3925	-,0965	-,1160	-,0286	-,0614	-,1074	-,0886	-,0418	-,0264	-,0073	,2547	,0850	,1059	-,3284	-,2375	-,0315	,0401	-,1312	-,1906	,0838	,1694	-,1246	-,1313	,2189	,2431	-,0383	-,0391	,3015	,2275	,1378	,0813	-,2785	-,2021	,2054	,1364	1,0000	,8072	-,0604
	N=47	N=47	N=47	N=47	N=47	N=47	N=47	N=47	N=47	N=47	N=47	N=47	N=47	N=47	N=47	N=47	N=47	N=47	N=47	N=47	N=47	N=47	N=47	N=47	N=47	N=47	N=47	N=47	N=47	N=47	N=47	N=47	N=47	N=47	N=47	N=47	N=47	N=47	N=47	N=47	N=47	N=47	N=47	N=47	N=47	N=47	N=47	N=47	N=47
	p=,378	p=,869	p=,160	p=,409	p=,309	p=,382	p=,405	p=,225	p=,691	p=,029	p=,005	p=,006	p=,519	p=,437	p=,848	p=,682	p=,472	p=,554	p=,780	p=,860	p=,961	p=,084	p=,570	p=,479	p=,024	p=,108	p=,833	p=,789	p=,379	p=,199	p=,575	p=,255	p=,404	p=,379	p=,139	p=,100	p=,798	p=,794	p=,039	p=,124	p=,356	p=,587	p=,058	p=,173	p=,166	p=,361	p= ---	p=,000	p=,687
Chol Cał T3M	,1908	,1023	,1728	,1307	-,0693	-,1974	-,0284	-,1803	,0117	,3744	-,3925	-,3436	-,0976	-,0801	-,0962	-,0810	-,0219	,0452	-,0816	,0556	,0492	,3281	-,0172	,0516	-,2568	-,1973	-,1126	-,0468	-,1376	-,2113	-,0290	,0812	-,1810	-,1625	,1818	,3459	-,1414	-,1767	,2321	,1987	,0350	-,0948	-,2700	-,1601	,1204	,1007	,8072	1,0000	,0251
	N=47	N=47	N=47	N=47	N=47	N=47	N=47	N=47	N=47	N=47	N=47	N=47	N=47	N=47	N=47	N=47	N=47	N=47	N=47	N=47	N=47	N=47	N=47	N=47	N=47	N=47	N=47	N=47	N=47	N=47	N=47	N=47	N=47	N=47	N=47	N=47	N=47	N=47	N=47	N=47	N=47	N=47	N=47	N=47	N=47	N=47	N=47	N=47	N=47
	p=,199	p=,494	p=,245	p=,381	p=,643	p=,184	p=,850	p=,225	p=,938	p=,010	p=,006	p=,018	p=,514	p=,592	p=,520	p=,589	p=,884	p=,763	p=,586	p=,710	p=,743	p=,024	p=,909	p=,731	p=,081	p=,184	p=,451	p=,755	p=,356	p=,154	p=,847	p=,587	p=,223	p=,275	p=,221	p=,017	p=,343	p=,235	p=,116	p=,181	p=,816	p=,526	p=,066	p=,282	p=,420	p=,501	p=,000	p= ---	p=,867
LDL T0	,0479	,0847	,1959	-,2008	-,1949	,0743	-,1240	,1150	-,1037	-,0812	,1351	,0781	,0547	,0970	,0642	,0383	,2789	,1547	-,2968	,0189	,1477	,1233	,1574	,1795	,1195	,0364	-,0531	,1724	-,1729	-,2498	,0459	,0772	,1122	,0905	-,1478	,0991	,1711	,3585	,0630	,0424	,0694	-,1247	-,0192	,0045	-,0707	-,0363	-,0604	,0251	1,0000
	N=47	N=47	N=47	N=47	N=47	N=47	N=47	N=47	N=47	N=47	N=47	N=47	N=47	N=47	N=47	N=47	N=47	N=47	N=47	N=47	N=47	N=47	N=47	N=47	N=47	N=47	N=47	N=47	N=47	N=47	N=47	N=47	N=47	N=47	N=47	N=47	N=47	N=47	N=47	N=47	N=47	N=47	N=47	N=47	N=47	N=47	N=47	N=47	N=47
	p=,749	p=,572	p=,187	p=,176	p=,189	p=,619	p=,406	p=,442	p=,488	p=,587	p=,365	p=,602	p=,715	p=,516	p=,668	p=,798	p=,058	p=,299	p=,043	p=,899	p=,322	p=,409	p=,291	p=,227	p=,424	p=,808	p=,723	p=,247	p=,245	p=,090	p=,759	p=,606	p=,453	p=,545	p=,321	p=,507	p=,250	p=,013	p=,674	p=,777	p=,643	p=,404	p=,898	p=,976	p=,637	p=,809	p=,687	p=,867	p= ---
LDL T3M	,1304	,1391	-,0732	-,1816	-,3768	-,0449	-,1973	,0175	-,0321	-,0361	,0798	,0059	,0161	,0471	-,0119	-,0542	,2520	-,0455	-,2217	-,0381	,0903	,0810	,0057	,1747	,0709	,0376	,1197	,2736	-,2187	-,2652	-,0013	,1298	,1919	,1899	-,1833	,0041	,2086	,3812	,0170	,0380	,0287	-,1120	,0257	-,0948	-,1709	-,0808	-,0809	,0277	,8094
	N=47	N=47	N=47	N=47	N=47	N=47	N=47	N=47	N=47	N=47	N=47	N=47	N=47	N=47	N=47	N=47	N=47	N=47	N=47	N=47	N=47	N=47	N=47	N=47	N=47	N=47	N=47	N=47	N=47	N=47	N=47	N=47	N=47	N=47	N=47	N=47	N=47	N=47	N=47	N=47	N=47	N=47	N=47	N=47	N=47	N=47	N=47	N=47	N=47
	p=,382	p=,351	p=,625	p=,222	p=,009	p=,764	p=,184	p=,907	p=,831	p=,810	p=,594	p=,968	p=,915	p=,753	p=,937	p=,718	p=,087	p=,761	p=,134	p=,799	p=,546	p=,589	p=,970	p=,240	p=,636	p=,802	p=,423	p=,063	p=,140	p=,072	p=,993	p=,384	p=,196	p=,201	p=,217	p=,978	p=,159	p=,008	p=,910	p=,800	p=,848	p=,453	p=,864	p=,526	p=,251	p=,589	p=,589	p=,853	p=,000
TGR 1	-,0334	-,1213	-,2638	,4979	,0267	-,0258	,1600	-,0054	,2766	-,0358	,1106	,1618	,3169	,2568	,0948	,0582	,0547	,1209	,0938	-,1286	-,3573	-,1187	,1695	,0329	-,0681	,0752	-,0355	-,1762	,3757	,2297	,0303	-,0027	,2140	,1914	-,1457	-,1458	-,1300	-,1927	,0691	-,0364	-,1254	,0114	-,0776	-,1519	,1613	,0215	,1368	,0480	-,3382
	N=47	N=47	N=47	N=47	N=47	N=47	N=47	N=47	N=47	N=47	N=47	N=47	N=47	N=47	N=47	N=47	N=47	N=47	N=47	N=47	N=47	N=47	N=47	N=47	N=47	N=47	N=47	N=47	N=47	N=47	N=47	N=47	N=47	N=47	N=47	N=47	N=47	N=47	N=47	N=47	N=47	N=47	N=47	N=47	N=47	N=47	N=47	N=47	N=47
	p=,824	p=,417	p=,073	p=,000	p=,859	p=,863	p=,283	p=,972	p=,060	p=,811	p=,459	p=,277	p=,030	p=,081	p=,526	p=,698	p=,715	p=,418	p=,530	p=,389	p=,014	p=,427	p=,255	p=,826	p=,649	p=,615	p=,813	p=,236	p=,009	p=,120	p=,840	p=,985	p=,149	p=,197	p=,329	p=,328	p=,384	p=,194	p=,645	p=,808	p=,401	p=,940	p=,604	p=,308	p=,279	p=,886	p=,359	p=,749	p=,020
TGR 2	-,0938	-,1189	-,2647	,4350	,0256	-,0905	,2107	,0220	,2491	-,0030	,1606	,2101	,2599	,2014	,1360	,1333	,1283	,1788	,1060	-,1403	-,3126	-,1124	,1957	,0524	,0889	,1539	-,1307	-,2282	,3991	,2374	,0516	,0265	,1856	,1609	-,1300	-,0859	-,1288	-,2317	,0574	,0155	-,1478	-,0494	-,1372	-,1582	,2014	,0676	,0526	,0368	-,3673
	N=47	N=47	N=47	N=47	N=47	N=47	N=47	N=47	N=47	N=47	N=47	N=47	N=47	N=47	N=47	N=47	N=47	N=47	N=47	N=47	N=47	N=47	N=47	N=47	N=47	N=47	N=47	N=47	N=47	N=47	N=47	N=47	N=47	N=47	N=47	N=47	N=47	N=47	N=47	N=47	N=47	N=47	N=47	N=47	N=47	N=47	N=47	N=47	N=47
	p=,531	p=,426	p=,072	p=,002	p=,864	p=,545	p=,155	p=,883	p=,091	p=,984	p=,281	p=,156	p=,078	p=,175	p=,362	p=,372	p=,390	p=,229	p=,478	p=,347	p=,032	p=,452	p=,187	p=,726	p=,552	p=,302	p=,381	p=,123	p=,005	p=,108	p=,731	p=,860	p=,212	p=,280	p=,384	p=,566	p=,388	p=,117	p=,702	p=,917	p=,321	p=,742	p=,358	p=,288	p=,175	p=,651	p=,726	p=,806	p=,011
CRP T0	,4537	,4523	,2298	-,0072	,1721	-,1977	-,1211	-,1694	,1034	,2615	-,3152	-,1885	-,1817	-,2547	-,2312	-,1813	-,1912	-,2468	,0366	-,1648	-,2781	,1364	-,0619	-,0870	,1118	-,0029	,1290	,1316	,2094	,1955	-,0099	-,0066	-,2137	-,2345	,1937	,1610	,0787	-,0816	,3169	,2278	-,0685	-,1178	-,1411	-,0907	-,0814	-,1933	,1385	,1249	,0350
	N=47	N=47	N=47	N=47	N=47	N=47	N=47	N=47	N=47	N=47	N=47	N=47	N=47	N=47	N=47	N=47	N=47	N=47	N=47	N=47	N=47	N=47	N=47	N=47	N=47	N=47	N=47	N=47	N=47	N=47	N=47	N=47	N=47	N=47	N=47	N=47	N=47	N=47	N=47	N=47	N=47	N=47	N=47	N=47	N=47	N=47	N=47	N=47	N=47
	p=,001	p=,001	p=,120	p=,962	p=,247	p=,183	p=,417	p=,255	p=,489	p=,076	p=,031	p=,204	p=,222	p=,084	p=,118	p=,222	p=,198	p=,094	p=,807	p=,268	p=,058	p=,361	p=,679	p=,561	p=,454	p=,985	p=,388	p=,378	p=,158	p=,188	p=,947	p=,965	p=,149	p=,113	p=,192	p=,280	p=,599	p=,586	p=,030	p=,124	p=,647	p=,430	p=,344	p=,544	p=,586	p=,193	p=,353	p=,403	p=,815
CRP T3M	,4590	,4537	,3264	-,0122	,1332	-,1851	-,2777	-,2190	-,0443	,2827	-,3859	-,2967	-,2430	-,2817	-,2208	-,2244	-,2149	-,2870	,1275	-,0801	-,1737	,1400	,0279	-,0313	,0553	-,0493	,1270	,1636	,0429	,0373	,0194	,0783	-,2604	-,3390	,2239	,1334	,1045	,0093	,3719	,3088	,0390	-,0697	-,2021	-,0837	-,0301	-,1697	,2976	,2296	,1207
	N=47	N=47	N=47	N=47	N=47	N=47	N=47	N=47	N=47	N=47	N=47	N=47	N=47	N=47	N=47	N=47	N=47	N=47	N=47	N=47	N=47	N=47	N=47	N=47	N=47	N=47	N=47	N=47	N=47	N=47	N=47	N=47	N=47	N=47	N=47	N=47	N=47	N=47	N=47	N=47	N=47	N=47	N=47	N=47	N=47	N=47	N=47	N=47	N=47
	p=,001	p=,001	p=,025	p=,935	p=,372	p=,213	p=,059	p=,139	p=,767	p=,054	p=,007	p=,043	p=,100	p=,055	p=,136	p=,129	p=,147	p=,050	p=,393	p=,592	p=,243	p=,348	p=,852	p=,834	p=,712	p=,742	p=,395	p=,272	p=,775	p=,803	p=,897	p=,601	p=,077	p=,020	p=,130	p=,371	p=,484	p=,951	p=,010	p=,035	p=,795	p=,642	p=,173	p=,576	p=,841	p=,254	p=,042	p=,121	p=,419
D-dimer T0	,4810	,3610	-,0482	-,1228	,0187	-,1740	-,2300	-,4257	,0464	,2754	-,1626	-,0973	,1728	,2166	-,1104	-,0948	-,0794	-,2331	,1125	,2484	-,0008	-,0302	-,1171	-,1663	-,2030	-,0094	,2431	,1891	,0463	,0557	-,2335	,2410	-,1165	-,0966	,0056	,0823	,0909	,1295	,0584	-,0205	,1909	,1844	,1802	,0207	-,0302	,0202	,0963	,1789	,0912
	N=47	N=47	N=47	N=47	N=47	N=47	N=47	N=47	N=47	N=47	N=47	N=47	N=47	N=47	N=47	N=47	N=47	N=47	N=47	N=47	N=47	N=47	N=47	N=47	N=47	N=47	N=47	N=47	N=47	N=47	N=47	N=47	N=47	N=47	N=47	N=47	N=47	N=47	N=47	N=47	N=47	N=47	N=47	N=47	N=47	N=47	N=47	N=47	N=47
	p=,001	p=,013	p=,748	p=,411	p=,901	p=,242	p=,120	p=,003	p=,757	p=,061	p=,275	p=,515	p=,245	p=,144	p=,460	p=,526	p=,596	p=,115	p=,451	p=,092	p=,996	p=,840	p=,433	p=,264	p=,171	p=,950	p=,100	p=,203	p=,757	p=,710	p=,114	p=,103	p=,435	p=,518	p=,970	p=,583	p=,543	p=,386	p=,696	p=,891	p=,199	p=,215	p=,225	p=,890	p=,840	p=,893	p=,520	p=,229	p=,542
D-dim T3M	,4348	,3719	-,0328	-,2177	,0713	-,1787	-,2275	-,4187	-,0764	,3826	-,1822	-,1329	,2695	,2820	-,0178	,0223	-,0064	-,2807	,0650	,1706	-,0055	-,0359	-,1537	-,1341	-,2470	-,0208	,3611	,2866	-,0145	,0740	-,2702	,1235	-,0674	-,0280	,0487	,0211	,1653	,1335	,0983	,0314	,1347	,1170	,0978	,1754	,0196	,0589	,1376	,2099	,0774
	N=47	N=47	N=47	N=47	N=47	N=47	N=47	N=47	N=47	N=47	N=47	N=47	N=47	N=47	N=47	N=47	N=47	N=47	N=47	N=47	N=47	N=47	N=47	N=47	N=47	N=47	N=47	N=47	N=47	N=47	N=47	N=47	N=47	N=47	N=47	N=47	N=47	N=47	N=47	N=47	N=47	N=47	N=47	N=47	N=47	N=47	N=47	N=47	N=47
	p=,002	p=,010	p=,826	p=,142	p=,634	p=,229	p=,124	p=,003	p=,610	p=,008	p=,220	p=,373	p=,067	p=,055	p=,905	p=,882	p=,966	p=,056	p=,664	p=,252	p=,971	p=,811	p=,302	p=,369	p=,094	p=,890	p=,013	p=,051	p=,923	p=,621	p=,066	p=,408	p=,652	p=,852	p=,745	p=,888	p=,267	p=,371	p=,511	p=,834	p=,367	p=,434	p=,513	p=,238	p=,896	p=,694	p=,356	p=,157	p=,605
obwod T0	-,1645	-,2235	-,0471	,1447	-,1398	,0882	,0136	-,0742	,0069	,0190	-,0229	-,0589	,0797	,1190	-,2174	-,1447	-,0046	,0640	-,0896	-,0713	,1635	,1371	-,3220	-,2122	-,1970	-,0257	-,0749	-,2087	-,1743	-,1544	,0144	-,0530	,0219	-,0188	-,1722	-,0817	-,0970	-,1489	-,0443	-,0615	-,0034	-,1451	-,0389	,2059	,0158	,0199	-,0304	,1734	-,1249
	N=47	N=47	N=47	N=47	N=47	N=47	N=47	N=47	N=47	N=47	N=47	N=47	N=47	N=47	N=47	N=47	N=47	N=47	N=47	N=47	N=47	N=47	N=47	N=47	N=47	N=47	N=47	N=47	N=47	N=47	N=47	N=47	N=47	N=47	N=47	N=47	N=47	N=47	N=47	N=47	N=47	N=47	N=47	N=47	N=47	N=47	N=47	N=47	N=47
	p=,269	p=,131	p=,753	p=,332	p=,349	p=,556	p=,928	p=,620	p=,963	p=,899	p=,879	p=,694	p=,594	p=,426	p=,142	p=,332	p=,976	p=,669	p=,549	p=,634	p=,272	p=,358	p=,027	p=,152	p=,184	p=,864	p=,617	p=,159	p=,241	p=,300	p=,923	p=,724	p=,884	p=,900	p=,247	p=,585	p=,516	p=,318	p=,767	p=,681	p=,982	p=,330	p=,795	p=,165	p=,916	p=,895	p=,839	p=,244	p=,403
0bwod T3M	-,1848	-,2760	,1497	,2919	-,0135	,0917	,1389	-,0282	,0408	,0404	-,0499	-,1495	,2179	,1508	-,0375	,0867	,0497	,1560	-,0141	-,0023	,1108	,1109	-,2358	-,0600	-,2239	-,0771	-,2847	-,2586	-,1082	-,1218	-,0898	-,0865	,1474	,1256	-,1679	,0246	-,0043	-,0167	-,0460	-,1727	-,0229	-,0806	-,1053	,2296	,1307	,0795	,1420	,3198	-,0178
	N=45	N=45	N=45	N=45	N=45	N=45	N=45	N=45	N=45	N=45	N=45	N=45	N=45	N=45	N=45	N=45	N=45	N=45	N=45	N=45	N=45	N=45	N=45	N=45	N=45	N=45	N=45	N=45	N=45	N=45	N=45	N=45	N=45	N=45	N=45	N=45	N=45	N=45	N=45	N=45	N=45	N=45	N=45	N=45	N=45	N=45	N=45	N=45	N=45
	p=,224	p=,066	p=,326	p=,052	p=,930	p=,549	p=,363	p=,854	p=,790	p=,792	p=,745	p=,327	p=,150	p=,323	p=,807	p=,571	p=,746	p=,306	p=,927	p=,988	p=,469	p=,468	p=,119	p=,696	p=,139	p=,615	p=,058	p=,086	p=,479	p=,426	p=,557	p=,572	p=,334	p=,411	p=,270	p=,873	p=,978	p=,913	p=,764	p=,257	p=,881	p=,599	p=,491	p=,129	p=,392	p=,604	p=,352	p=,032	p=,908
VAS T0	-,0441	-,0775	-,0427	-,2870	-,1337	-,0076	,1948	,2436	,0254	-,0401	,1220	,0649	-,1341	,0157	,0695	,1035	-,0012	,1754	-,2995	,0639	,2196	,3083	-,1190	,0921	,1920	-,0898	-,1123	,0721	-,1064	-,0656	-,0604	-,2273	-,0669	-,0551	-,0257	,1724	-,0649	,0782	-,2134	-,2462	-,0730	-,1102	-,0601	-,0185	-,1683	-,1796	-,0928	,1602	,0996
	N=47	N=47	N=47	N=47	N=47	N=47	N=47	N=47	N=47	N=47	N=47	N=47	N=47	N=47	N=47	N=47	N=47	N=47	N=47	N=47	N=47	N=47	N=47	N=47	N=47	N=47	N=47	N=47	N=47	N=47	N=47	N=47	N=47	N=47	N=47	N=47	N=47	N=47	N=47	N=47	N=47	N=47	N=47	N=47	N=47	N=47	N=47	N=47	N=47
	p=,768	p=,605	p=,776	p=,050	p=,370	p=,960	p=,189	p=,099	p=,865	p=,789	p=,414	p=,665	p=,369	p=,916	p=,642	p=,489	p=,994	p=,238	p=,041	p=,669	p=,138	p=,035	p=,426	p=,538	p=,196	p=,548	p=,452	p=,630	p=,477	p=,661	p=,687	p=,124	p=,655	p=,713	p=,864	p=,246	p=,665	p=,602	p=,150	p=,095	p=,626	p=,461	p=,688	p=,902	p=,258	p=,227	p=,535	p=,282	p=,505
VAS T3M	-,0593	-,1594	-,0313	-,2131	,0457	-,2777	,0975	-,2669	-,1184	,1443	-,2372	-,2763	-,1161	-,0992	-,0891	-,0027	-,1149	-,1893	,0409	,0398	-,1063	,1327	-,1836	,0102	,0717	-,0200	,0960	,1253	-,0428	,0102	-,2075	-,3069	-,2042	-,2651	,0906	,1144	-,2328	,0065	,1376	,0763	,0062	-,0908	-,1012	,1185	,0734	,0100	,1063	,2677	,0753
	N=47	N=47	N=47	N=47	N=47	N=47	N=47	N=47	N=47	N=47	N=47	N=47	N=47	N=47	N=47	N=47	N=47	N=47	N=47	N=47	N=47	N=47	N=47	N=47	N=47	N=47	N=47	N=47	N=47	N=47	N=47	N=47	N=47	N=47	N=47	N=47	N=47	N=47	N=47	N=47	N=47	N=47	N=47	N=47	N=47	N=47	N=47	N=47	N=47
	p=,692	p=,284	p=,834	p=,150	p=,761	p=,059	p=,515	p=,070	p=,428	p=,333	p=,108	p=,060	p=,437	p=,507	p=,552	p=,986	p=,442	p=,203	p=,785	p=,791	p=,477	p=,374	p=,217	p=,946	p=,632	p=,894	p=,521	p=,402	p=,775	p=,946	p=,162	p=,036	p=,169	p=,072	p=,545	p=,444	p=,115	p=,965	p=,356	p=,610	p=,967	p=,544	p=,499	p=,428	p=,624	p=,947	p=,477	p=,069	p=,615
Endostatin1	-,1384	-,0584	,1503	-,0844	-,1399	,2686	,0299	,0215	-,1810	-,0298	,0082	-,1599	-,0347	-,1587	-,0978	-,0160	-,1231	-,2340	,0723	,0488	,0314	-,1114	-,2543	-,1593	,1281	-,0748	-,1393	,1251	-,0440	-,0353	,1507	,0027	,3297	,2977	-,0342	-,0473	,1818	,2114	,1643	,1043	-,2686	-,3997	,0155	,2046	,0988	,0775	,0341	-,0592	,2018
	N=35	N=35	N=35	N=35	N=35	N=35	N=35	N=35	N=35	N=35	N=35	N=35	N=35	N=35	N=35	N=35	N=35	N=35	N=35	N=35	N=35	N=35	N=35	N=35	N=35	N=35	N=35	N=35	N=35	N=35	N=35	N=35	N=35	N=35	N=35	N=35	N=35	N=35	N=35	N=35	N=35	N=35	N=35	N=35	N=35	N=35	N=35	N=35	N=35
	p=,428	p=,739	p=,389	p=,630	p=,423	p=,119	p=,865	p=,903	p=,298	p=,865	p=,963	p=,359	p=,843	p=,363	p=,576	p=,927	p=,481	p=,176	p=,680	p=,781	p=,858	p=,524	p=,140	p=,361	p=,463	p=,669	p=,425	p=,474	p=,802	p=,840	p=,387	p=,988	p=,053	p=,082	p=,845	p=,787	p=,296	p=,223	p=,345	p=,551	p=,119	p=,017	p=,930	p=,238	p=,572	p=,658	p=,846	p=,736	p=,245
Endostati2	-,2420	-,2285	-,0323	,0157	-,1952	,1564	,1119	,0158	,0013	,0485	-,1159	-,2603	-,1179	-,2041	-,1213	-,0406	-,1564	-,0328	-,0679	-,1935	-,2253	-,2086	-,3982	-,2931	,0420	-,1890	-,0830	,0385	-,1167	-,0597	,2337	-,0618	,1026	,1091	-,0318	,1296	,0615	,1415	,1417	,1221	-,2917	-,3719	,1991	,2410	,0332	,0641	-,0830	-,0483	-,0452
	N=35	N=35	N=35	N=35	N=35	N=35	N=35	N=35	N=35	N=35	N=35	N=35	N=35	N=35	N=35	N=35	N=35	N=35	N=35	N=35	N=35	N=35	N=35	N=35	N=35	N=35	N=35	N=35	N=35	N=35	N=35	N=35	N=35	N=35	N=35	N=35	N=35	N=35	N=35	N=35	N=35	N=35	N=35	N=35	N=35	N=35	N=35	N=35	N=35
	p=,161	p=,187	p=,854	p=,929	p=,261	p=,370	p=,522	p=,928	p=,994	p=,782	p=,507	p=,131	p=,500	p=,239	p=,488	p=,817	p=,370	p=,851	p=,698	p=,265	p=,193	p=,229	p=,018	p=,087	p=,810	p=,277	p=,635	p=,826	p=,504	p=,734	p=,177	p=,724	p=,558	p=,533	p=,856	p=,458	p=,725	p=,418	p=,417	p=,485	p=,089	p=,028	p=,251	p=,163	p=,850	p=,715	p=,636	p=,783	p=,797
HDL 1	-,1339	-,0456	-,1789	,0040	-,2050	,1698	,0833	,4897	,1092	,2196	,4378	,2577	-,0390	-,1026	-,0583	,0266	,0816	-,0619	,2174	,0797	,2520	,1615	-,0042	-,2473	,2155	,1846	-,1218	,0951	-,0235	-,0144	,0577	,2741	-,0341	-,0138	-,2632	-,1196	,1006	-,0281	-,1928	-,0978	-,2557	-,3497	,0037	-,1995	-,2182	-,3508	-,1089	-,0074	,0958
	N=35	N=35	N=35	N=35	N=35	N=35	N=35	N=35	N=35	N=35	N=35	N=35	N=35	N=35	N=35	N=35	N=35	N=35	N=35	N=35	N=35	N=35	N=35	N=35	N=35	N=35	N=35	N=35	N=35	N=35	N=35	N=35	N=35	N=35	N=35	N=35	N=35	N=35	N=35	N=35	N=35	N=35	N=35	N=35	N=35	N=35	N=35	N=35	N=35
	p=,443	p=,795	p=,304	p=,982	p=,237	p=,329	p=,634	p=,003	p=,532	p=,205	p=,009	p=,135	p=,824	p=,558	p=,739	p=,879	p=,641	p=,724	p=,210	p=,649	p=,144	p=,354	p=,981	p=,152	p=,214	p=,288	p=,486	p=,587	p=,893	p=,934	p=,742	p=,111	p=,846	p=,937	p=,127	p=,494	p=,565	p=,873	p=,267	p=,576	p=,138	p=,039	p=,983	p=,251	p=,208	p=,039	p=,534	p=,966	p=,584
HDL 2	-,1819	-,0583	-,2570	,0119	-,2003	,1470	,1024	,4650	,0988	,1689	,4464	,2561	,1002	-,0249	-,0654	,0081	,1576	-,0695	,3077	,1071	,2203	,1004	,0207	-,3426	,2223	,2806	-,1635	,0377	,0203	,0442	,0154	,2592	,0999	,1143	-,3213	-,2131	,1181	-,0256	-,2569	-,1451	-,2935	-,3687	-,0632	-,2464	-,1916	-,2939	-,1248	-,0804	,0765
	N=35	N=35	N=35	N=35	N=35	N=35	N=35	N=35	N=35	N=35	N=35	N=35	N=35	N=35	N=35	N=35	N=35	N=35	N=35	N=35	N=35	N=35	N=35	N=35	N=35	N=35	N=35	N=35	N=35	N=35	N=35	N=35	N=35	N=35	N=35	N=35	N=35	N=35	N=35	N=35	N=35	N=35	N=35	N=35	N=35	N=35	N=35	N=35	N=35
	p=,296	p=,739	p=,136	p=,946	p=,249	p=,399	p=,558	p=,005	p=,572	p=,332	p=,007	p=,137	p=,567	p=,887	p=,709	p=,963	p=,366	p=,692	p=,072	p=,540	p=,204	p=,566	p=,906	p=,044	p=,199	p=,103	p=,348	p=,830	p=,908	p=,801	p=,930	p=,133	p=,568	p=,513	p=,060	p=,219	p=,499	p=,884	p=,136	p=,406	p=,087	p=,029	p=,718	p=,154	p=,270	p=,087	p=,475	p=,646	p=,662
Angiostatin1	-,0323	-,0474	,0130	-,2287	,0272	,0625	,0490	-,1850	-,1066	-,0316	,3013	,3746	,3209	,3358	,2338	,3035	,2194	,1833	-,1515	-,0677	-,0573	-,1469	,1078	-,0183	,4180	,2348	,0743	,1072	,3212	,2506	-,1113	-,0642	,1573	,1573	-,1032	,0615	-,0790	-,1440	,1799	-,0432	,0177	-,1209	,0357	,0968	,1210	-,0171	-,2271	-,1760	,2988
	N=35	N=35	N=35	N=35	N=35	N=35	N=35	N=35	N=35	N=35	N=35	N=35	N=35	N=35	N=35	N=35	N=35	N=35	N=35	N=35	N=35	N=35	N=35	N=35	N=35	N=35	N=35	N=35	N=35	N=35	N=35	N=35	N=35	N=35	N=35	N=35	N=35	N=35	N=35	N=35	N=35	N=35	N=35	N=35	N=35	N=35	N=35	N=35	N=35
	p=,854	p=,787	p=,941	p=,186	p=,877	p=,721	p=,780	p=,287	p=,542	p=,857	p=,079	p=,027	p=,060	p=,049	p=,176	p=,076	p=,205	p=,292	p=,385	p=,699	p=,744	p=,400	p=,538	p=,917	p=,012	p=,175	p=,671	p=,540	p=,060	p=,146	p=,525	p=,714	p=,367	p=,367	p=,555	p=,725	p=,652	p=,409	p=,301	p=,805	p=,920	p=,489	p=,838	p=,580	p=,489	p=,922	p=,190	p=,312	p=,081
Angiostatin2	-,3023	-,2102	-,0767	-,1666	,0942	-,0582	,2354	,0448	,0977	-,0273	,4585	,4159	,6603	,6263	,5460	,5047	,3622	,3315	-,0570	-,1655	-,1998	-,4583	,2001	,0046	,3300	,2522	-,0167	-,0714	,2568	,0806	,0411	,0060	-,0074	,0763	-,2702	-,0787	-,1436	-,1879	-,0700	-,0502	-,1028	-,2396	-,2259	,0939	,3781	,3788	-,1649	-,2841	,2088
	N=35	N=35	N=35	N=35	N=35	N=35	N=35	N=35	N=35	N=35	N=35	N=35	N=35	N=35	N=35	N=35	N=35	N=35	N=35	N=35	N=35	N=35	N=35	N=35	N=35	N=35	N=35	N=35	N=35	N=35	N=35	N=35	N=35	N=35	N=35	N=35	N=35	N=35	N=35	N=35	N=35	N=35	N=35	N=35	N=35	N=35	N=35	N=35	N=35
	p=,078	p=,226	p=,661	p=,339	p=,590	p=,740	p=,173	p=,798	p=,577	p=,876	p=,006	p=,013	p=,000	p=,000	p=,001	p=,002	p=,033	p=,052	p=,745	p=,342	p=,250	p=,006	p=,249	p=,979	p=,053	p=,144	p=,924	p=,684	p=,136	p=,645	p=,814	p=,973	p=,966	p=,663	p=,116	p=,653	p=,411	p=,280	p=,689	p=,775	p=,557	p=,166	p=,192	p=,591	p=,025	p=,025	p=,344	p=,098	p=,229
Fibryn1	,1669	,1694	,0506	,0809	-,2245	,1048	-,0670	-,0051	,0475	-,1737	-,1134	-,2545	,0366	-,0731	,0145	,0333	-,0830	-,1061	,0360	,1781	-,2147	,1616	-,1199	,1820	-,0302	-,1350	,0273	,3032	,1588	,1844	-,0606	-,0542	,3375	,2855	-,0609	,0310	,0242	,1092	,1887	,1295	,0401	,0162	,0002	,1868	,0239	,0575	,1080	,0848	,1194
	N=35	N=35	N=35	N=35	N=35	N=35	N=35	N=35	N=35	N=35	N=35	N=35	N=35	N=35	N=35	N=35	N=35	N=35	N=35	N=35	N=35	N=35	N=35	N=35	N=35	N=35	N=35	N=35	N=35	N=35	N=35	N=35	N=35	N=35	N=35	N=35	N=35	N=35	N=35	N=35	N=35	N=35	N=35	N=35	N=35	N=35	N=35	N=35	N=35
	p=,338	p=,331	p=,773	p=,644	p=,195	p=,549	p=,702	p=,977	p=,787	p=,318	p=,516	p=,140	p=,835	p=,677	p=,934	p=,849	p=,636	p=,544	p=,837	p=,306	p=,216	p=,354	p=,493	p=,295	p=,863	p=,439	p=,876	p=,077	p=,362	p=,289	p=,729	p=,757	p=,047	p=,096	p=,728	p=,860	p=,890	p=,532	p=,278	p=,458	p=,819	p=,927	p=,999	p=,283	p=,891	p=,743	p=,537	p=,628	p=,494
Fibryn2	,1435	,1388	,2830	,0486	-,2131	,0296	-,2670	-,2200	,0643	,0301	-,4820	-,3701	-,1516	-,1589	-,1811	-,1684	-,1237	-,2089	-,0027	,0871	,1609	,2039	-,0621	,0252	,0371	-,1240	-,1622	,1252	,2130	,2455	-,0156	-,0928	-,0237	-,1378	,3046	,1634	-,1486	-,0532	,2689	,2778	,3341	,2815	,0225	,1150	-,1144	-,0752	,2308	,2120	,0509
	N=35	N=35	N=35	N=35	N=35	N=35	N=35	N=35	N=35	N=35	N=35	N=35	N=35	N=35	N=35	N=35	N=35	N=35	N=35	N=35	N=35	N=35	N=35	N=35	N=35	N=35	N=35	N=35	N=35	N=35	N=35	N=35	N=35	N=35	N=35	N=35	N=35	N=35	N=35	N=35	N=35	N=35	N=35	N=35	N=35	N=35	N=35	N=35	N=35
	p=,411	p=,427	p=,100	p=,781	p=,219	p=,866	p=,121	p=,204	p=,714	p=,864	p=,003	p=,029	p=,385	p=,362	p=,298	p=,334	p=,479	p=,228	p=,988	p=,619	p=,356	p=,240	p=,723	p=,886	p=,832	p=,478	p=,352	p=,474	p=,219	p=,155	p=,929	p=,596	p=,892	p=,430	p=,075	p=,348	p=,394	p=,761	p=,118	p=,106	p=,050	p=,101	p=,898	p=,511	p=,513	p=,668	p=,182	p=,222	p=,771
1dop C4	,1636	,1878	-,0648	,3239	,1022	,1449	-,1012	-,0511	,2341	-,0566	-,0128	-,0779	-,1051	-,1668	-,2811	-,2545	-,1752	,3023	-,2453	-,0080	-,5137	-,0649	-,1867	,1353	-,3315	-,2432	-,0584	-,1192	,1432	,0683	,1694	,0001	,1993	,1920	,0592	-,0108	,0904	-,1231	,1559	,1738	-,1169	-,0026	,3224	,1268	,0733	,1664	,0085	,0664	-,0658
	N=35	N=35	N=35	N=35	N=35	N=35	N=35	N=35	N=35	N=35	N=35	N=35	N=35	N=35	N=35	N=35	N=35	N=35	N=35	N=35	N=35	N=35	N=35	N=35	N=35	N=35	N=35	N=35	N=35	N=35	N=35	N=35	N=35	N=35	N=35	N=35	N=35	N=35	N=35	N=35	N=35	N=35	N=35	N=35	N=35	N=35	N=35	N=35	N=35
	p=,348	p=,280	p=,711	p=,058	p=,559	p=,406	p=,563	p=,771	p=,176	p=,747	p=,942	p=,656	p=,548	p=,338	p=,102	p=,140	p=,314	p=,078	p=,156	p=,964	p=,002	p=,711	p=,283	p=,438	p=,052	p=,159	p=,739	p=,495	p=,412	p=,696	p=,330	p=,999	p=,251	p=,269	p=,736	p=,951	p=,605	p=,481	p=,371	p=,318	p=,504	p=,988	p=,059	p=,468	p=,675	p=,339	p=,961	p=,705	p=,707
2dopC4	,0767	,0677	,0374	,4354	,2252	,0931	-,3237	-,1691	,0976	-,1072	-,2829	-,2769	-,1131	-,0934	-,2923	-,3249	-,1383	,3209	-,1284	-,0257	-,2917	-,0631	,0087	,2080	-,2647	-,2469	-,2581	-,2466	,1518	,0222	,2108	-,0040	,1328	,0418	,2347	-,0599	-,0480	-,1794	,1952	,2727	,0539	,1510	,1364	-,0154	,0843	,2183	,1774	,1384	-,1523
	N=35	N=35	N=35	N=35	N=35	N=35	N=35	N=35	N=35	N=35	N=35	N=35	N=35	N=35	N=35	N=35	N=35	N=35	N=35	N=35	N=35	N=35	N=35	N=35	N=35	N=35	N=35	N=35	N=35	N=35	N=35	N=35	N=35	N=35	N=35	N=35	N=35	N=35	N=35	N=35	N=35	N=35	N=35	N=35	N=35	N=35	N=35	N=35	N=35
	p=,661	p=,699	p=,831	p=,009	p=,193	p=,595	p=,058	p=,331	p=,577	p=,540	p=,100	p=,107	p=,518	p=,593	p=,088	p=,057	p=,428	p=,060	p=,462	p=,883	p=,089	p=,719	p=,960	p=,230	p=,124	p=,153	p=,134	p=,153	p=,384	p=,899	p=,224	p=,982	p=,447	p=,812	p=,175	p=,733	p=,784	p=,302	p=,261	p=,113	p=,759	p=,387	p=,435	p=,930	p=,630	p=,208	p=,308	p=,428	p=,382
1 dopC3	-,0951	,0350	,1896	-,0972	,3524	-,2235	,0737	-,0818	,1777	,3712	-,0014	,0253	-,2913	-,3954	,0340	,0670	-,0858	-,0465	-,0504	,0581	-,0936	,0689	-,0913	,0523	-,0257	-,0092	-,0912	-,1991	-,1657	-,1585	-,1738	-,1575	-,2318	-,1563	,2641	,1090	,1159	-,0166	,1086	,3065	-,0551	-,1036	,0939	,4501	,0297	,1347	,0724	,2217	-,1567
	N=35	N=35	N=35	N=35	N=35	N=35	N=35	N=35	N=35	N=35	N=35	N=35	N=35	N=35	N=35	N=35	N=35	N=35	N=35	N=35	N=35	N=35	N=35	N=35	N=35	N=35	N=35	N=35	N=35	N=35	N=35	N=35	N=35	N=35	N=35	N=35	N=35	N=35	N=35	N=35	N=35	N=35	N=35	N=35	N=35	N=35	N=35	N=35	N=35
	p=,587	p=,842	p=,275	p=,579	p=,038	p=,197	p=,674	p=,641	p=,307	p=,028	p=,994	p=,885	p=,090	p=,019	p=,846	p=,702	p=,624	p=,791	p=,774	p=,740	p=,593	p=,694	p=,602	p=,765	p=,884	p=,958	p=,602	p=,252	p=,342	p=,363	p=,318	p=,366	p=,180	p=,370	p=,125	p=,533	p=,507	p=,924	p=,535	p=,073	p=,753	p=,554	p=,591	p=,007	p=,866	p=,440	p=,679	p=,201	p=,369
1dopC3	-,1723	-,0706	,1066	,0643	,3730	-,2073	,1238	-,2049	,0918	,1327	-,0480	-,0139	-,2192	-,2920	,0675	,0849	-,1847	-,1570	,1545	,0644	-,2232	-,1118	-,0622	,0308	-,0636	-,0845	-,0759	-,1713	,0310	-,0583	-,0706	-,1207	-,2157	-,2168	,2918	,1146	-,0143	,0028	,1002	,3894	-,2007	-,1172	,1918	,3486	,1950	,2539	-,0924	-,0833	-,2588
	N=35	N=35	N=35	N=35	N=35	N=35	N=35	N=35	N=35	N=35	N=35	N=35	N=35	N=35	N=35	N=35	N=35	N=35	N=35	N=35	N=35	N=35	N=35	N=35	N=35	N=35	N=35	N=35	N=35	N=35	N=35	N=35	N=35	N=35	N=35	N=35	N=35	N=35	N=35	N=35	N=35	N=35	N=35	N=35	N=35	N=35	N=35	N=35	N=35
	p=,322	p=,687	p=,542	p=,713	p=,027	p=,232	p=,479	p=,238	p=,600	p=,447	p=,784	p=,937	p=,206	p=,089	p=,700	p=,628	p=,288	p=,368	p=,376	p=,713	p=,197	p=,523	p=,722	p=,861	p=,716	p=,629	p=,665	p=,325	p=,860	p=,739	p=,687	p=,490	p=,213	p=,211	p=,089	p=,512	p=,935	p=,987	p=,567	p=,021	p=,248	p=,502	p=,270	p=,040	p=,262	p=,141	p=,598	p=,634	p=,133
Plazmi1	,0574	,0380	,0848	-,0590	,1246	-,2772	,0017	-,2342	,0474	,0542	-,2839	-,1739	,2308	,1437	,1286	,0258	,1028	-,0399	,1004	,1768	,1643	,0719	-,0789	,0295	-,1972	,0100	,2104	-,0483	-,0104	,0643	-,1541	-,3234	,0105	,1237	,3048	-,0434	,0631	-,0019	-,0543	-,0331	,1064	,2107	,0129	-,0584	-,2066	,0587	,2119	,0381	-,0739
	N=35	N=35	N=35	N=35	N=35	N=35	N=35	N=35	N=35	N=35	N=35	N=35	N=35	N=35	N=35	N=35	N=35	N=35	N=35	N=35	N=35	N=35	N=35	N=35	N=35	N=35	N=35	N=35	N=35	N=35	N=35	N=35	N=35	N=35	N=35	N=35	N=35	N=35	N=35	N=35	N=35	N=35	N=35	N=35	N=35	N=35	N=35	N=35	N=35
	p=,743	p=,828	p=,628	p=,736	p=,476	p=,107	p=,992	p=,176	p=,787	p=,757	p=,098	p=,318	p=,182	p=,410	p=,462	p=,883	p=,557	p=,820	p=,566	p=,310	p=,346	p=,681	p=,652	p=,867	p=,256	p=,955	p=,225	p=,783	p=,953	p=,714	p=,377	p=,058	p=,952	p=,479	p=,075	p=,805	p=,719	p=,991	p=,757	p=,850	p=,543	p=,224	p=,941	p=,739	p=,234	p=,738	p=,222	p=,828	p=,673
Plazmi2	,1409	,1665	,2931	-,0654	,1883	-,1337	-,2404	-,0919	-,0816	,0680	-,3216	-,2140	,0021	-,0367	-,0570	-,1371	-,0794	-,3213	,2289	,2686	,3233	,1205	-,0612	,0215	-,1717	-,0165	,1251	-,0230	-,0515	,0280	-,1225	-,1877	,0103	,0137	,3284	-,2621	,0160	,0193	,0125	,0233	,1890	,2352	-,0847	-,0294	-,2357	-,0694	,2726	-,0134	-,0515
	N=35	N=35	N=35	N=35	N=35	N=35	N=35	N=35	N=35	N=35	N=35	N=35	N=35	N=35	N=35	N=35	N=35	N=35	N=35	N=35	N=35	N=35	N=35	N=35	N=35	N=35	N=35	N=35	N=35	N=35	N=35	N=35	N=35	N=35	N=35	N=35	N=35	N=35	N=35	N=35	N=35	N=35	N=35	N=35	N=35	N=35	N=35	N=35	N=35
	p=,420	p=,339	p=,087	p=,709	p=,279	p=,444	p=,164	p=,600	p=,641	p=,698	p=,060	p=,217	p=,991	p=,834	p=,745	p=,432	p=,650	p=,060	p=,186	p=,119	p=,058	p=,490	p=,727	p=,903	p=,324	p=,925	p=,474	p=,895	p=,769	p=,873	p=,483	p=,280	p=,953	p=,938	p=,054	p=,128	p=,928	p=,912	p=,943	p=,894	p=,277	p=,174	p=,629	p=,867	p=,173	p=,692	p=,113	p=,939	p=,769
[truncated: 25 more columns]
